# Supplementary material for: Suzuki-Type Cross-Coupling Reaction of Unprotected 3-Iodoindazoles with Pinacol Vinyl Boronate: An Expeditive C-3 Vinylation of Indazoles under Microwave Irradiation
Source: PubMed Central journal article supplement (PMC6222620; doi:10.3390/molecules23082051), 2018-08-16
Supplement: molecules-23-02051-s001.pdf [file molecules-23-02051-s001.pdf]

*Supporting Information for:*

**Suzuki-type Cross-Coupling Reaction of Unprotected 3-Iodoindazoles with Pinacol Vinyl Boronate: An Expeditive C-3 Vinylation of Indazoles under Microwave Irradiation.**

Gonzalo Vera<sup>1</sup>, Benjamín Diethelm<sup>1</sup>, Claudio Terraza<sup>2</sup>, Gonzalo Recabarren-Gajardo<sup>1,3,\*</sup>

<sup>1</sup>*Departamento de Farmacia, Facultad de Química, Pontificia Universidad Católica de Chile, Casilla 306, Avda. Vicuña Mackenna 4860, Macul 7820436, Santiago, Chile.*

<sup>2</sup>*Departamento de Química Orgánica, Facultad de Química, Pontificia Universidad Católica de Chile, Casilla 306, Avda. Vicuña Mackenna 4860, Macul 7820436, Santiago, Chile.*

<sup>3</sup>*Centro Interdisciplinario de Neurociencias, Pontificia Universidad Católica de Chile, Marcoleta 391, Santiago 8330024, Santiago, Chile.*

**Contents:**

1. NMR data of all compounds ..... S2-S25

---

\* Corresponding author. Tel: +56-2-23541418; Fax: +56-2-23544744; e-mail: grecabarren@uc.cl

## 1. NMR data of all compounds

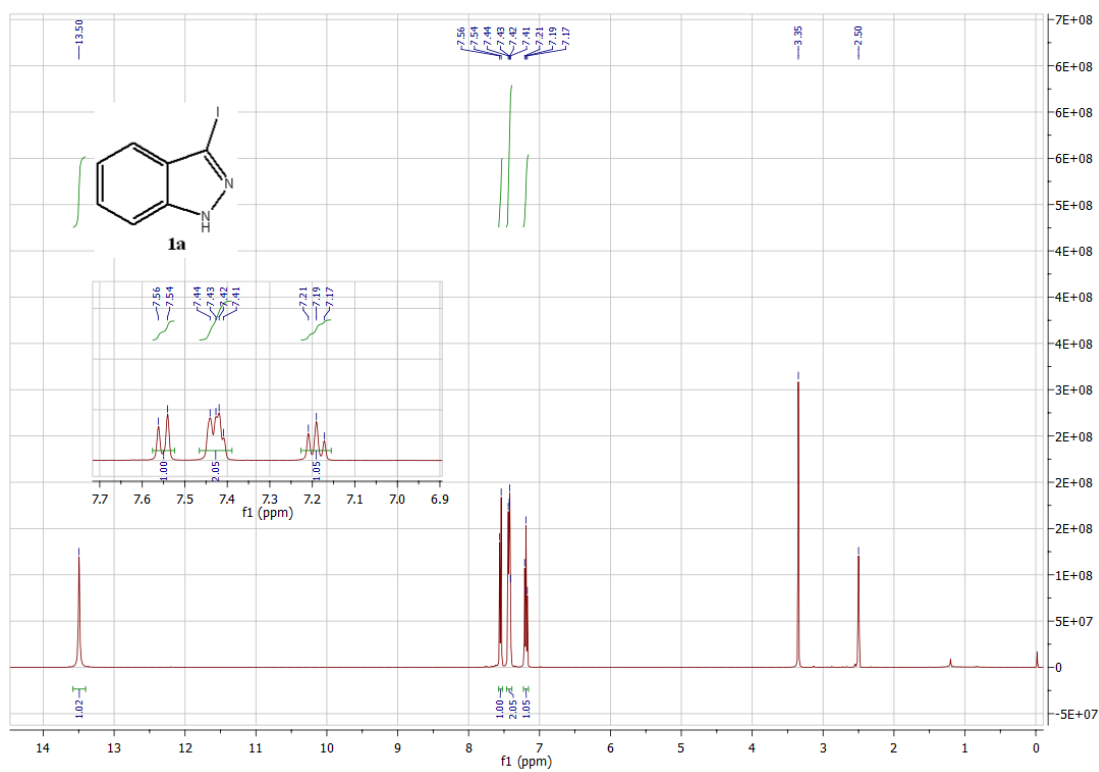

Figure S1. <sup>1</sup>H-NMR spectrum of **1a**

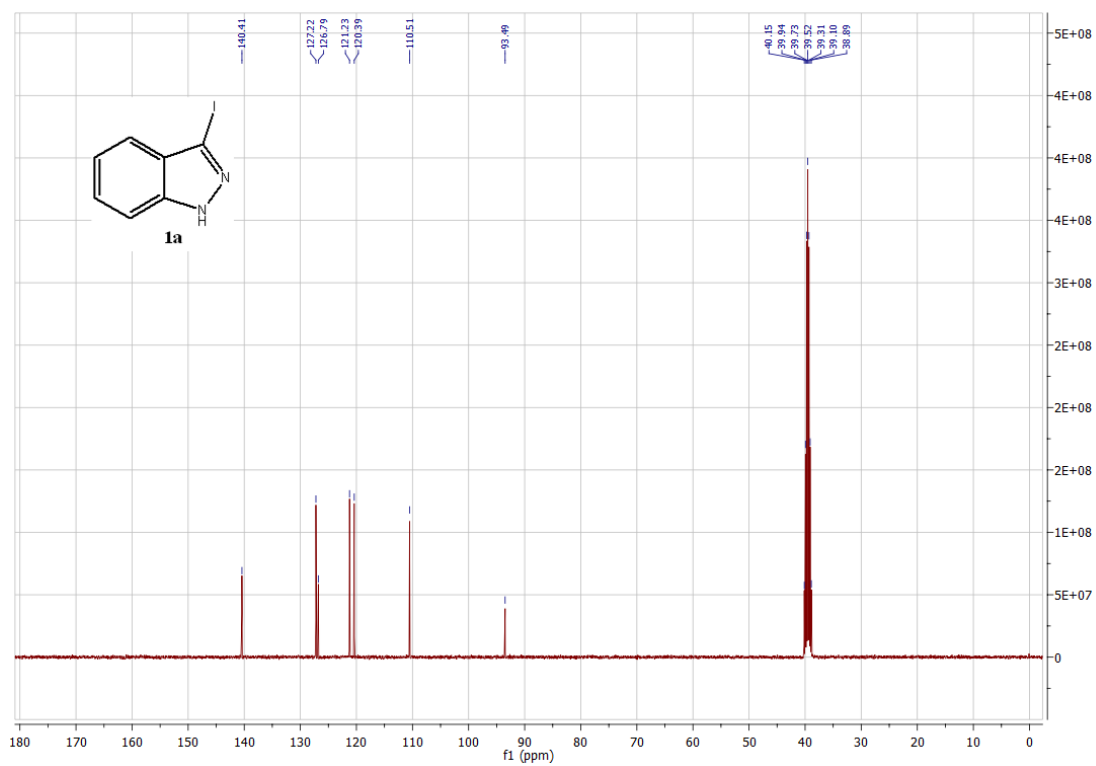

Figure S2. <sup>13</sup>C-NMR spectrum of **1a**

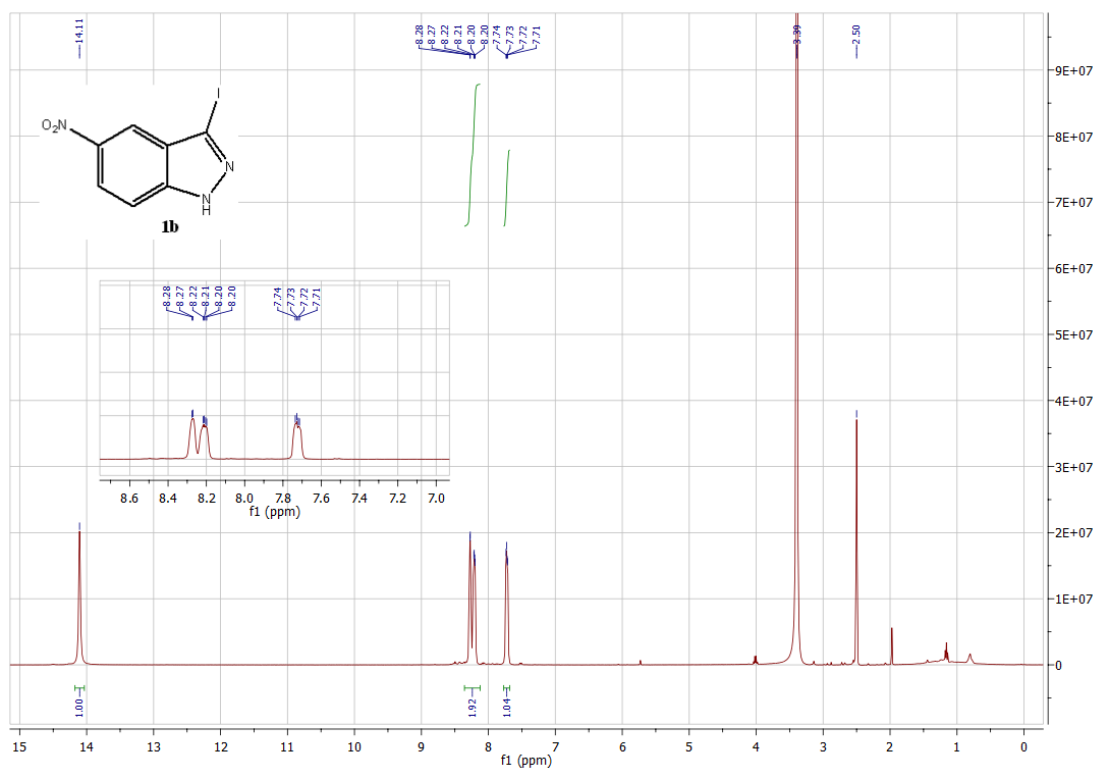

Figure S3. <sup>1</sup>H-NMR spectrum of **1b**

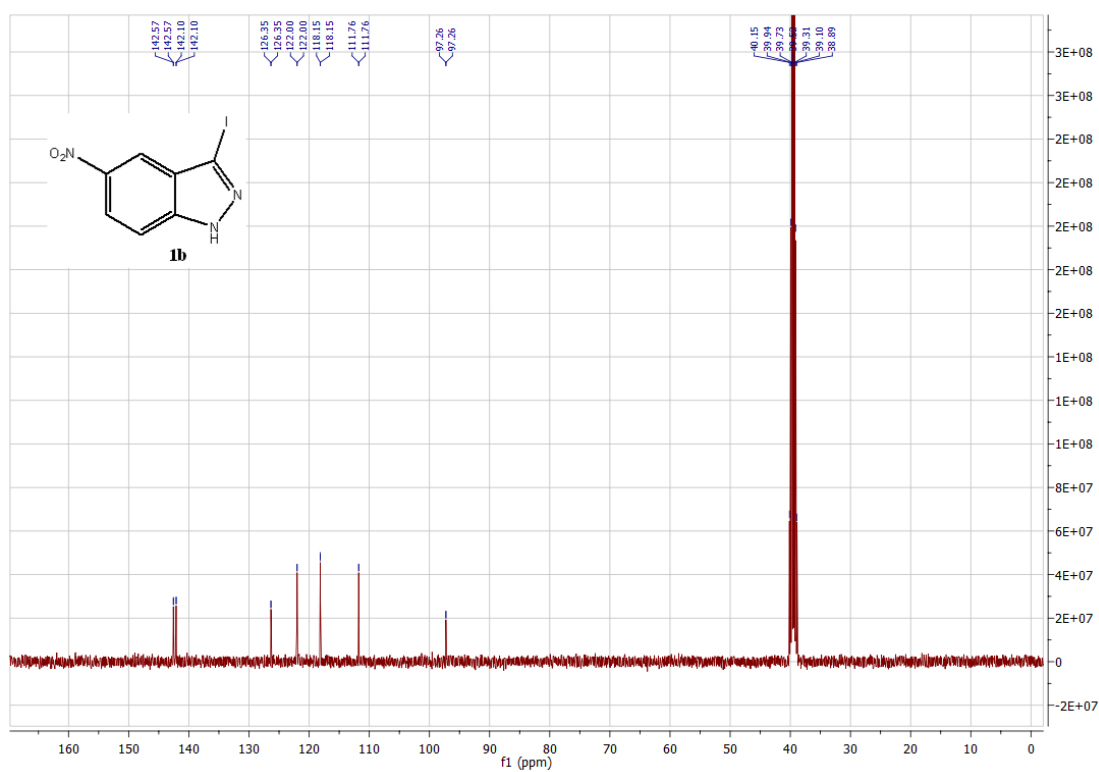

Figure S4. <sup>13</sup>C-NMR spectrum of **1b**

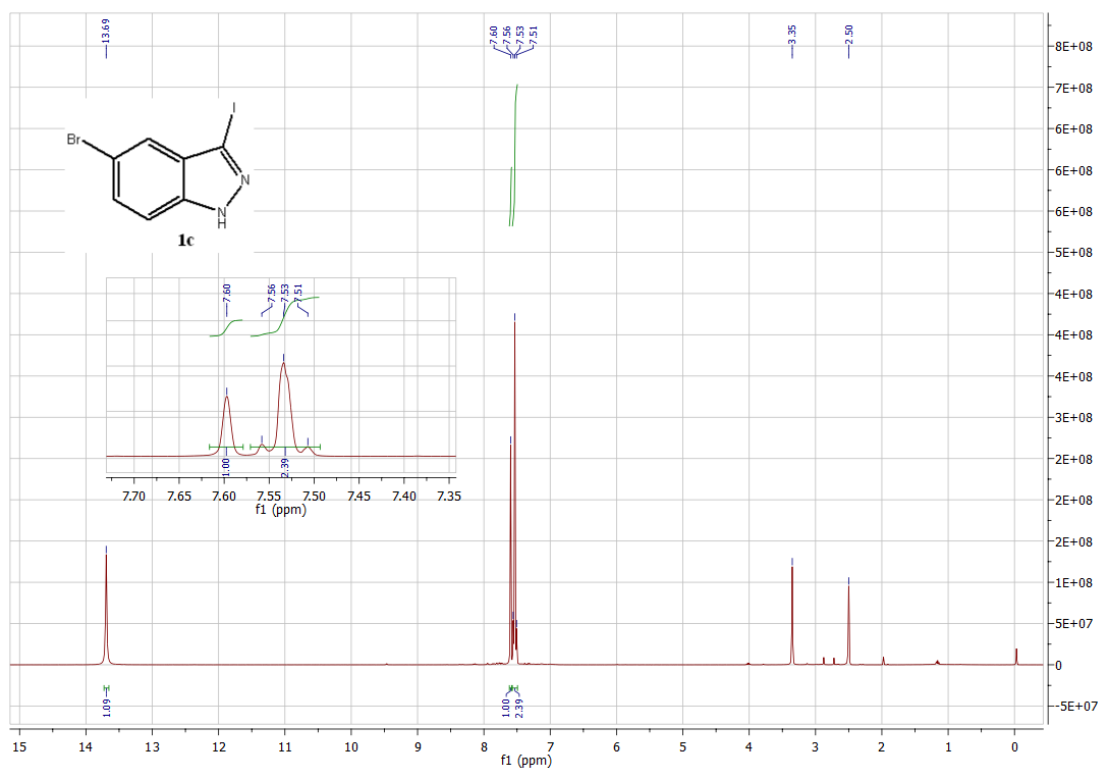

Figure S5. <sup>1</sup>H-NMR spectrum of **1c**

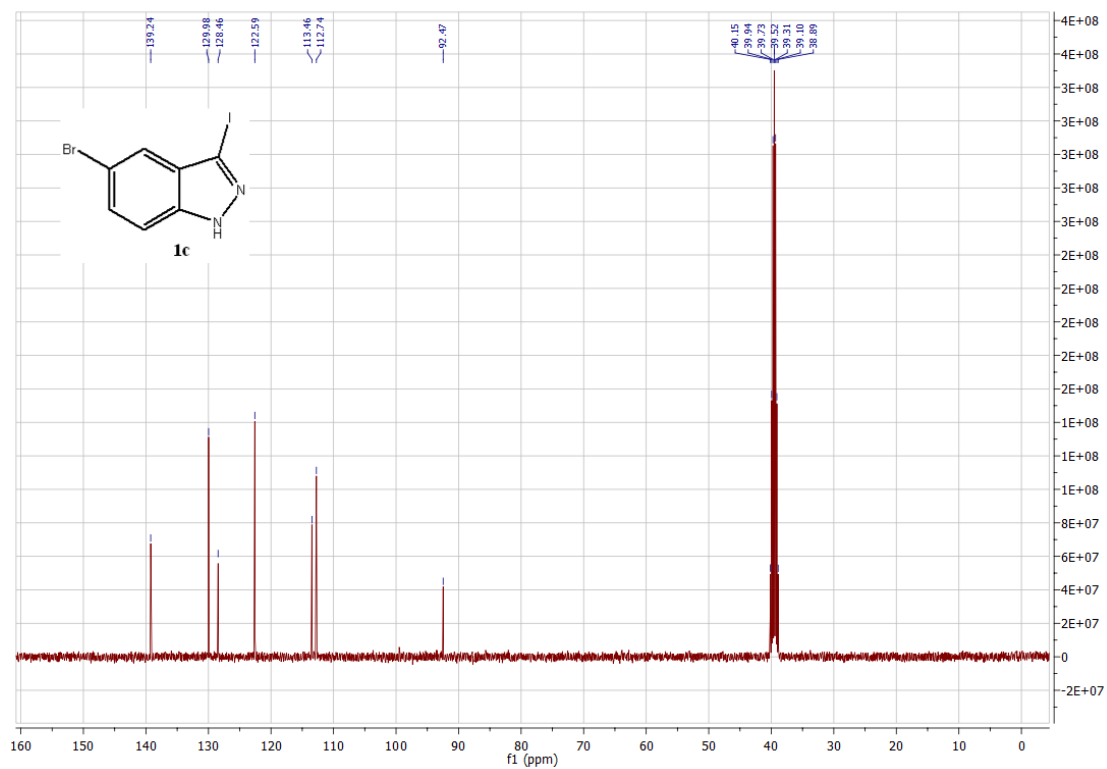

Figure S6. <sup>13</sup>C-NMR spectrum of **1c**

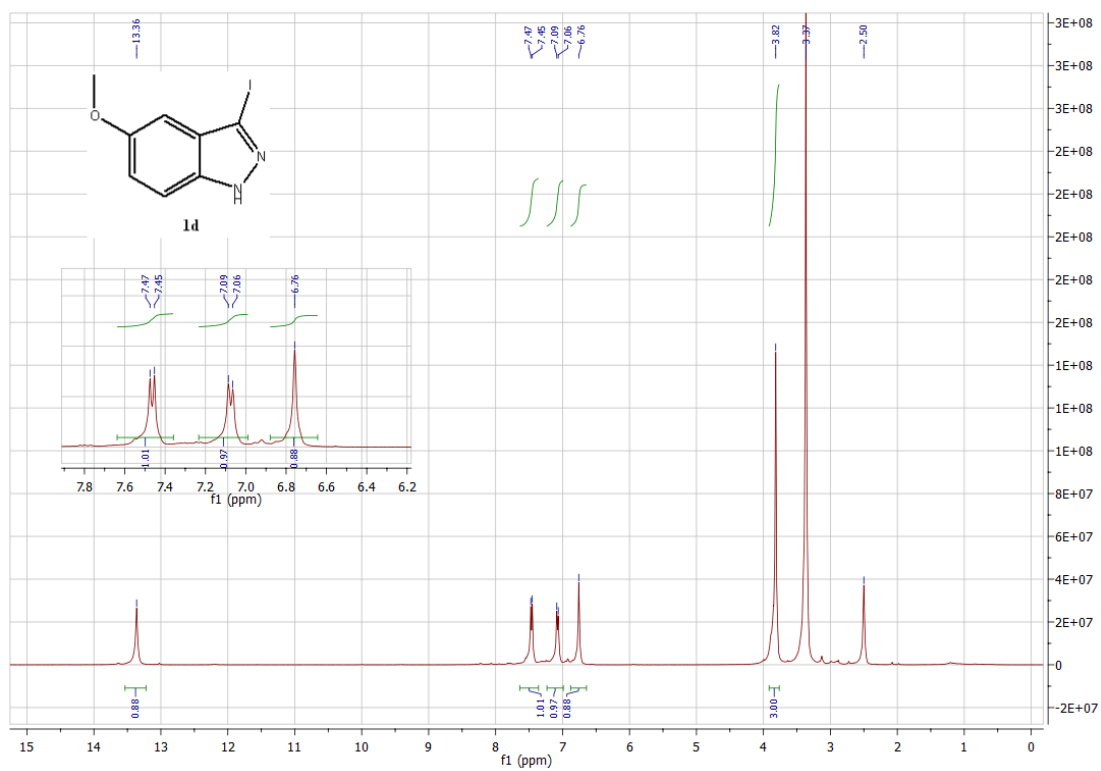

Figure S7. <sup>1</sup>H-NMR spectrum of **1d**

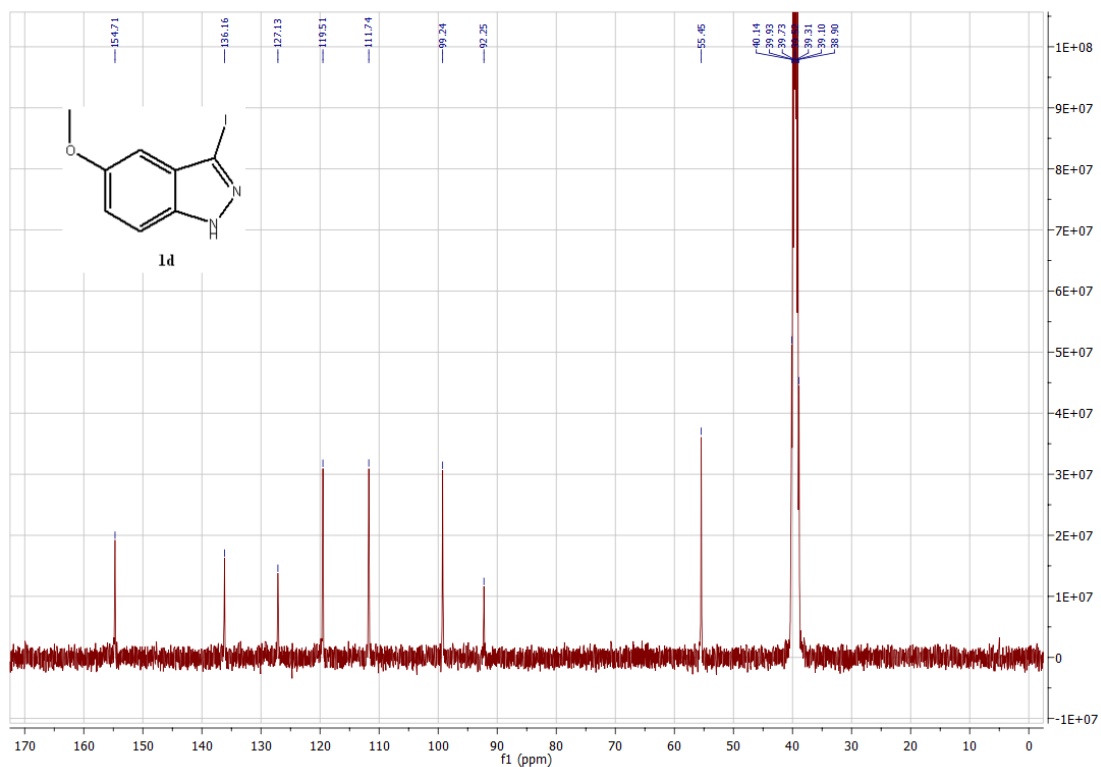

Figure S8. <sup>13</sup>C-NMR spectrum of **1d**

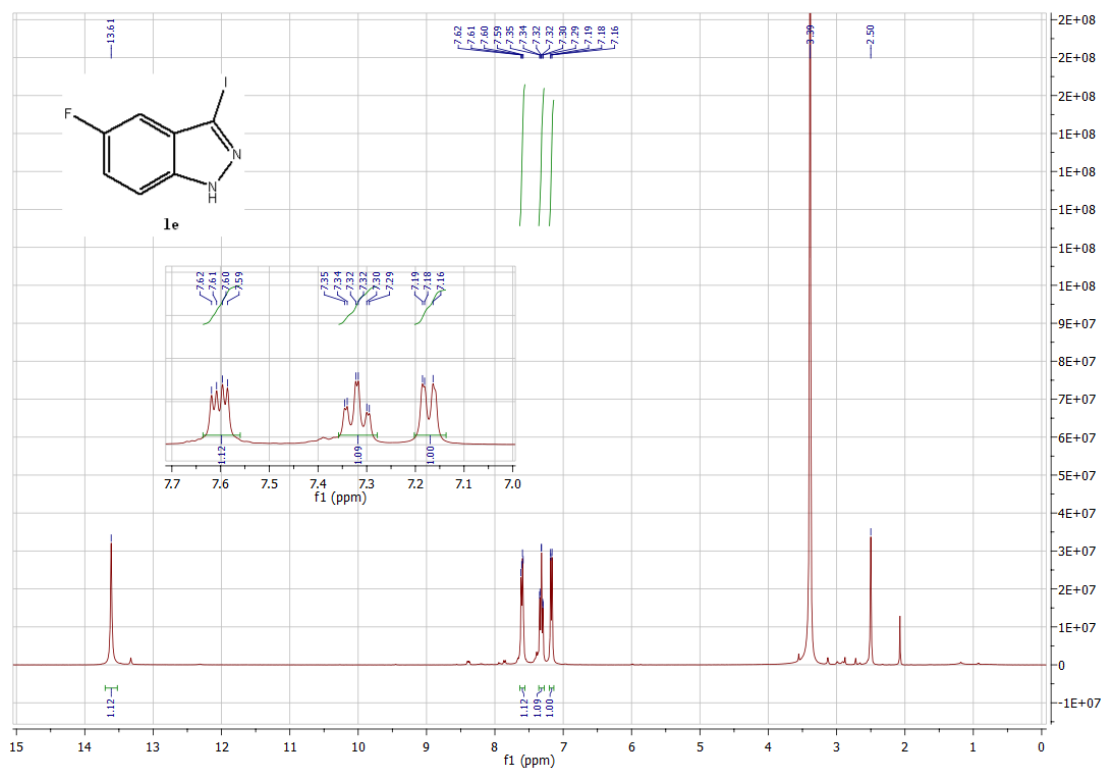

Figure S9.  $^1\text{H-NMR}$  spectrum of **1e**

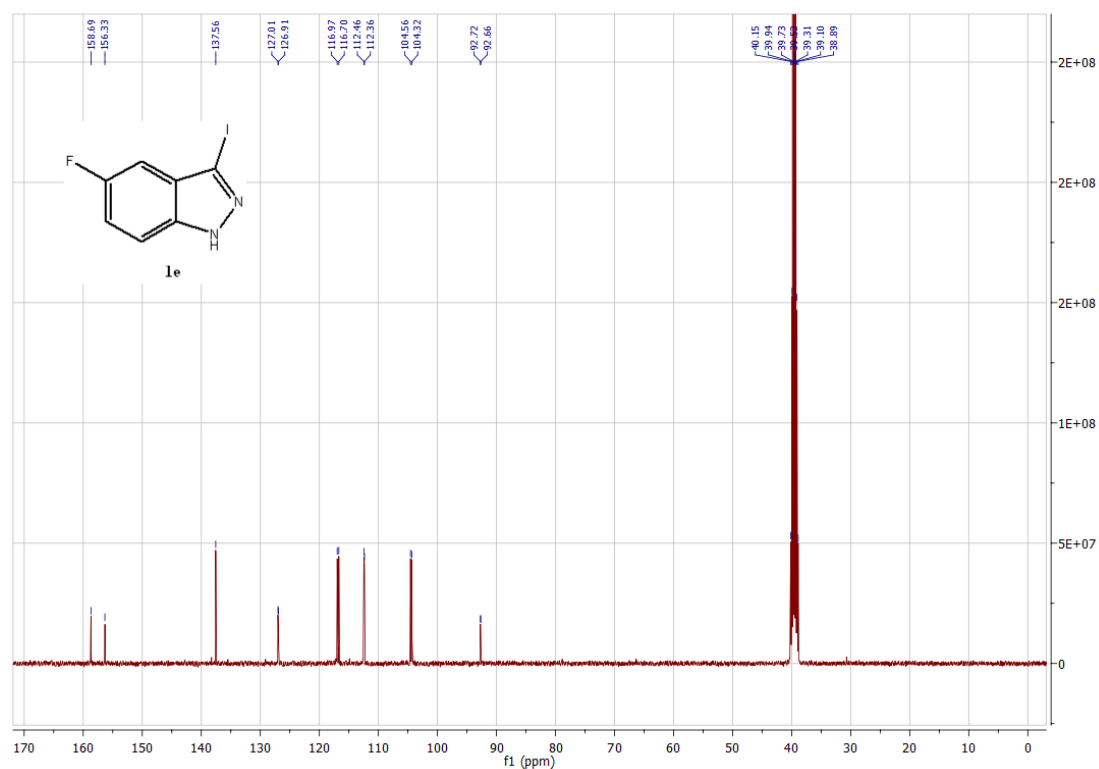

Figure S10.  $^{13}\text{C-NMR}$  spectrum of **1e**

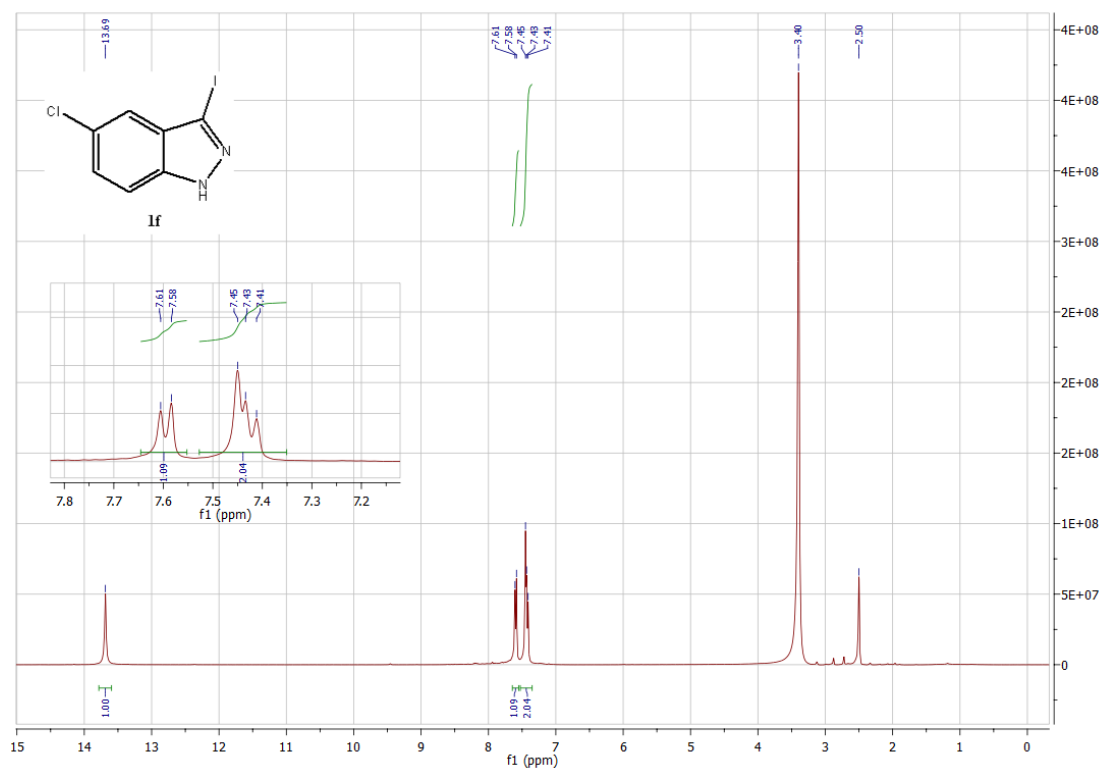

Figure S11. <sup>1</sup>H-NMR spectrum of **1f**

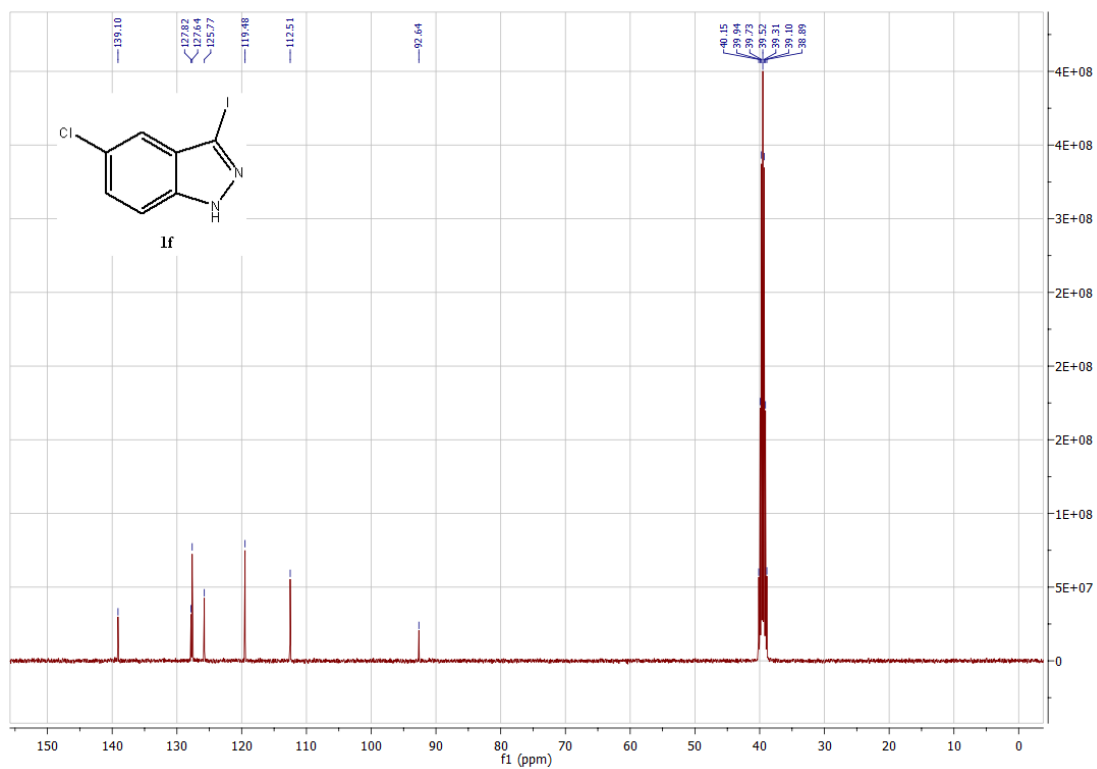

Figure S12. <sup>13</sup>C-NMR spectrum of **1f**

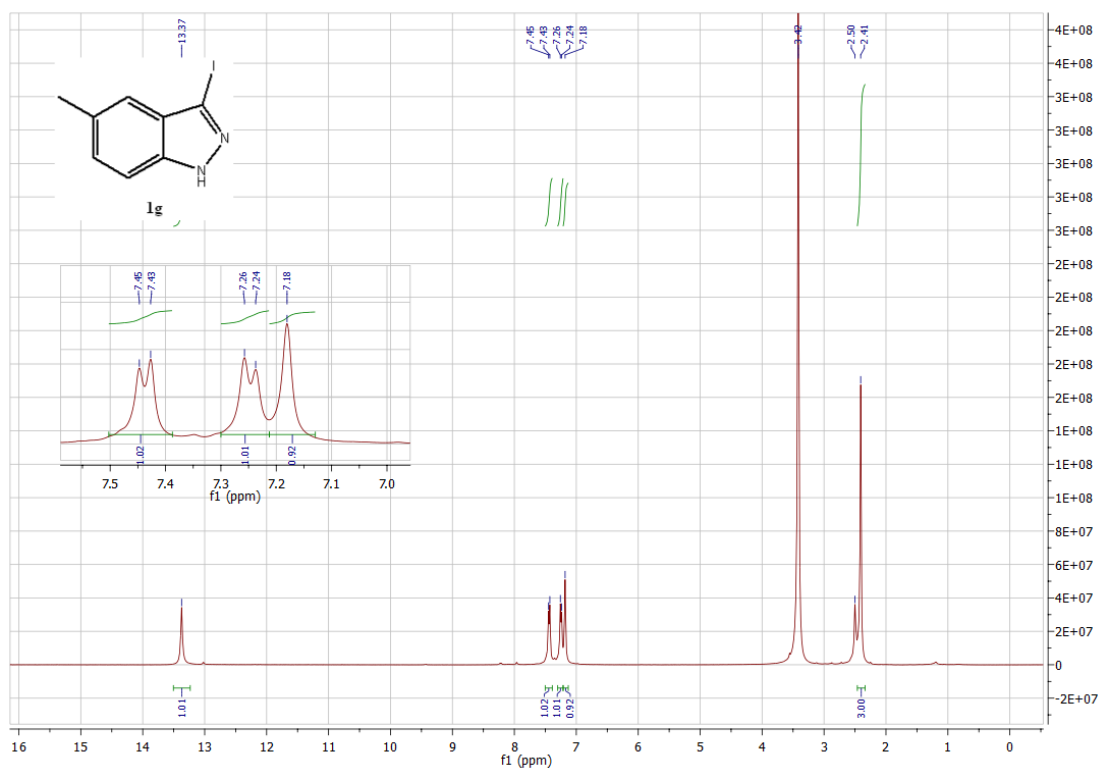

Figure S13. <sup>1</sup>H-NMR spectrum of 1g

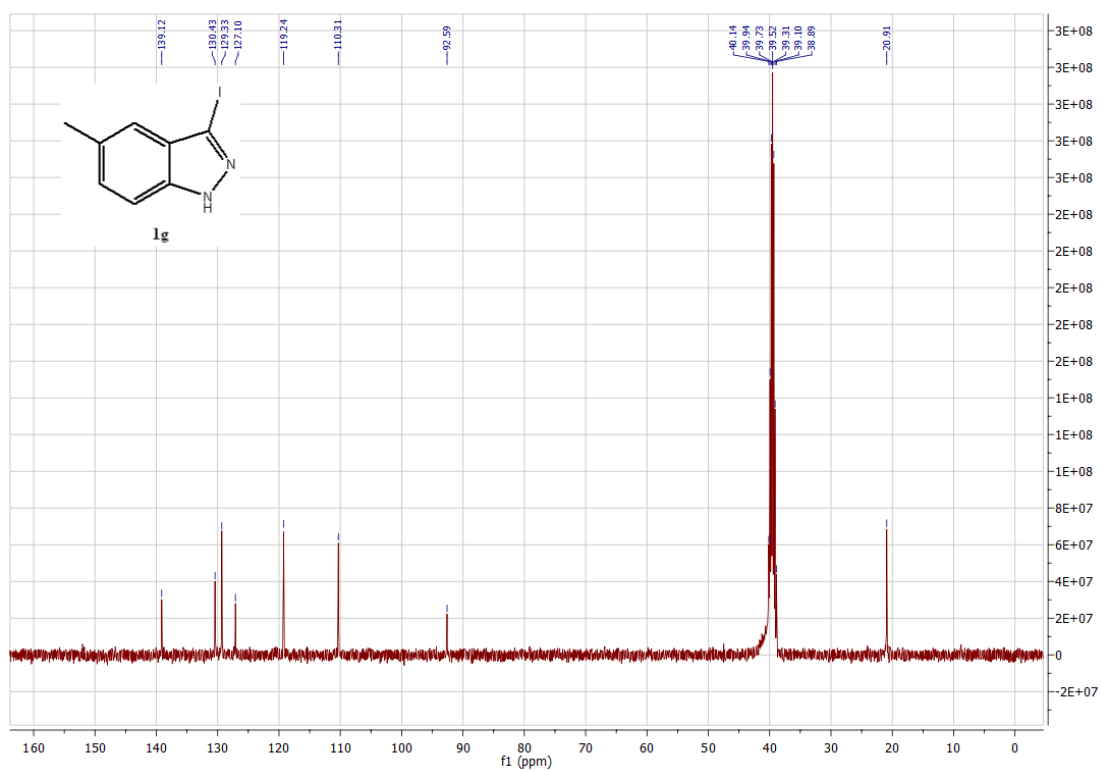

Figure S14. <sup>13</sup>C-NMR spectrum of 1g



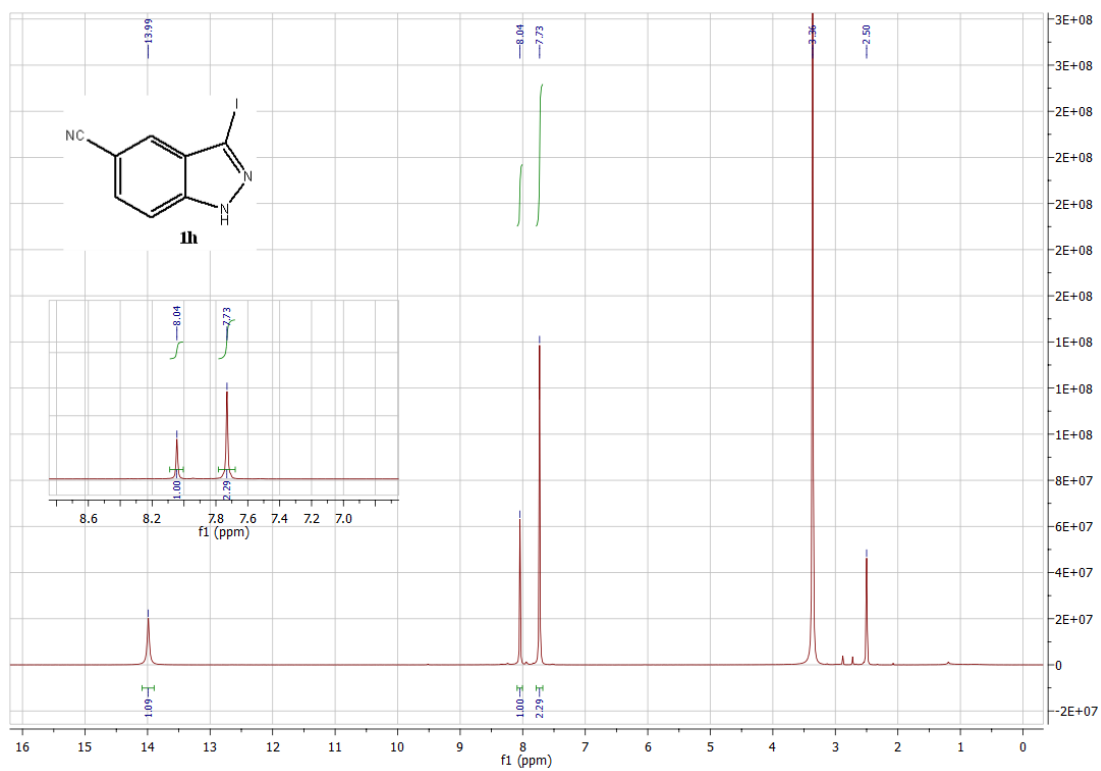

Figure S15. <sup>1</sup>H-NMR spectrum of **1h**

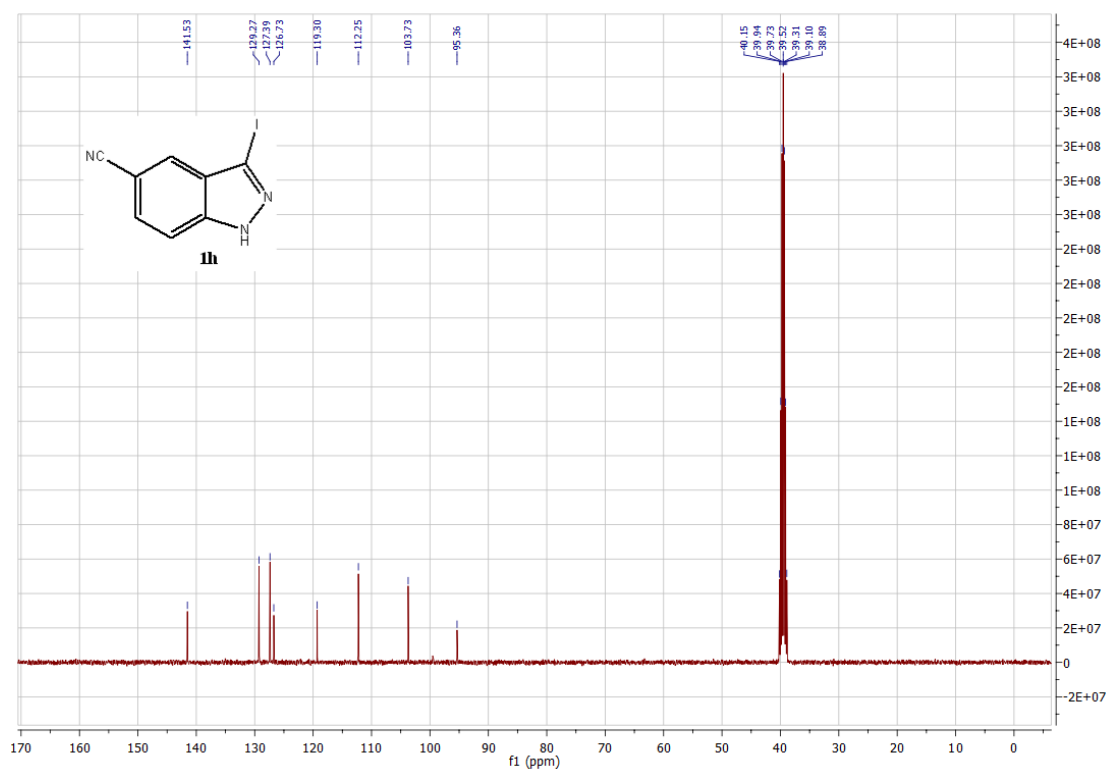

Figure S16. <sup>13</sup>C-NMR spectrum of **1h**

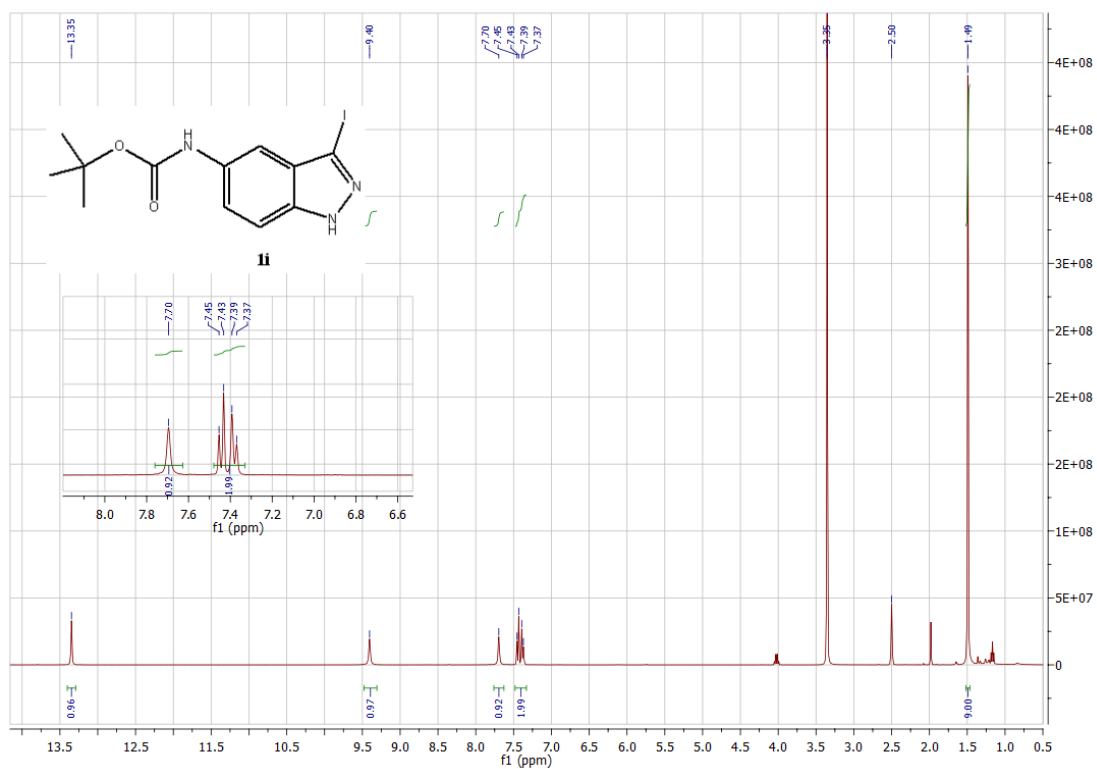

Figure S17. <sup>1</sup>H-NMR spectrum of 1i

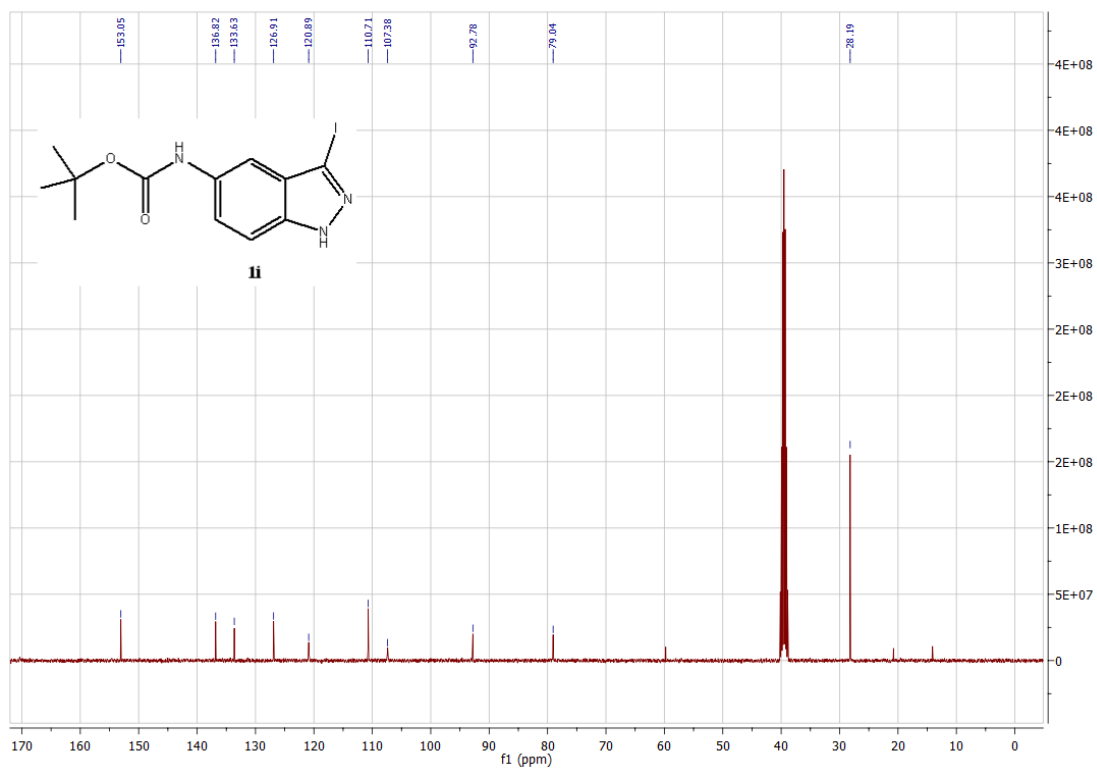

Figure S18. <sup>13</sup>C-NMR spectrum of 1i

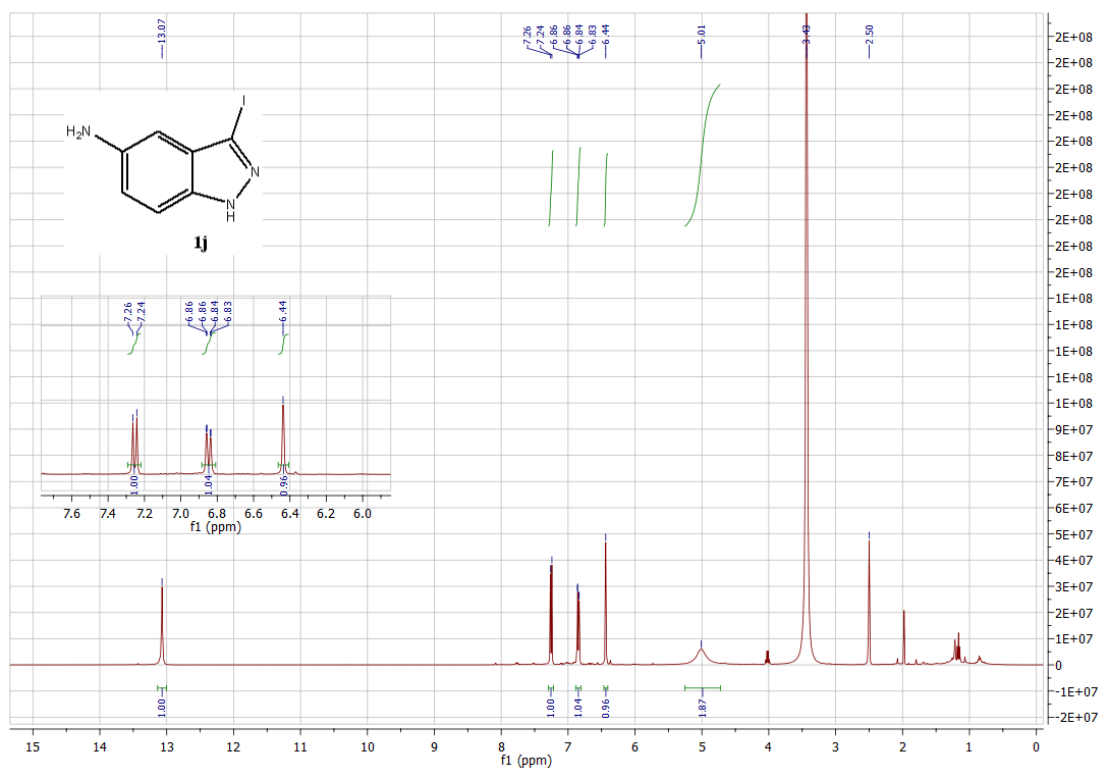

Figure S19. <sup>1</sup>H-NMR spectrum of **1j**

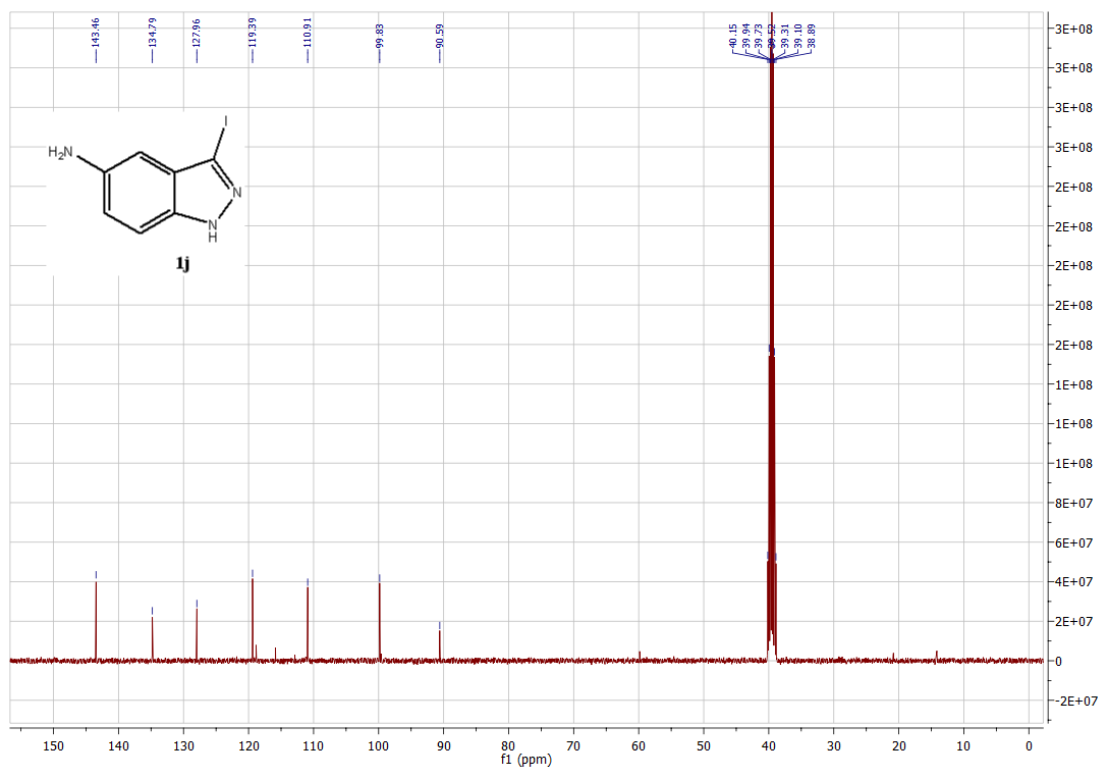

Figure S20. <sup>13</sup>C-NMR spectrum of **1j**

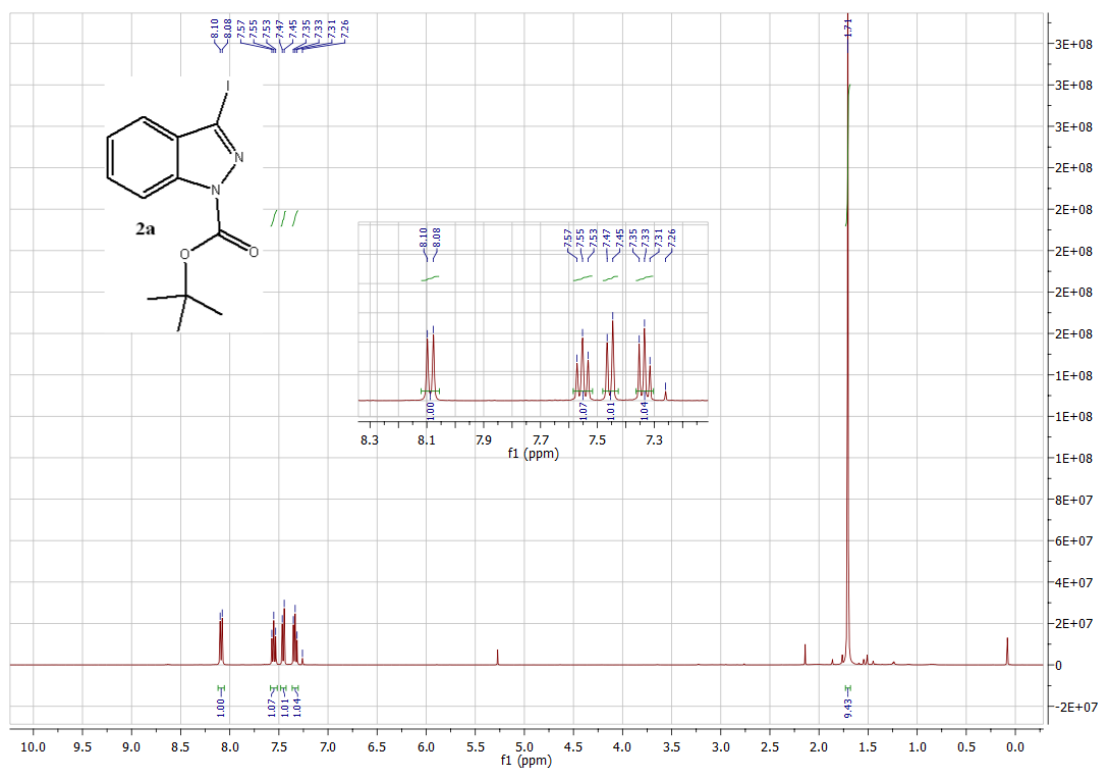

Figure S21. <sup>1</sup>H-NMR spectrum of 2a

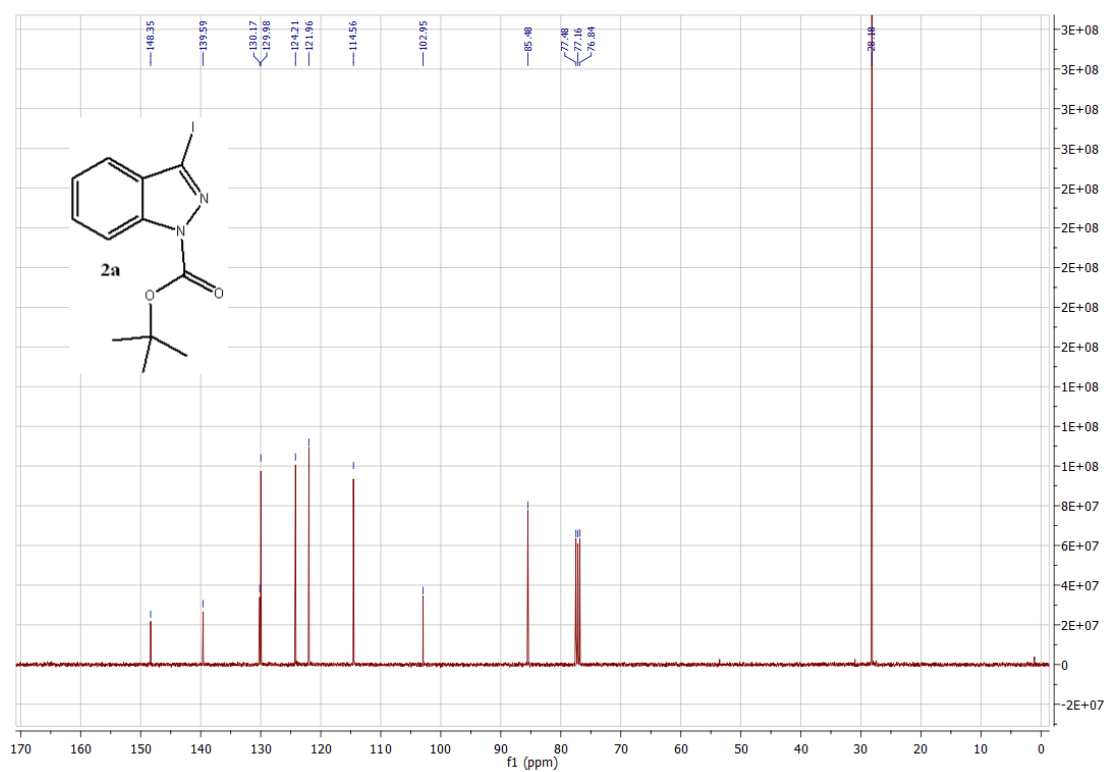

Figure S22. <sup>13</sup>C-NMR spectrum of 2a

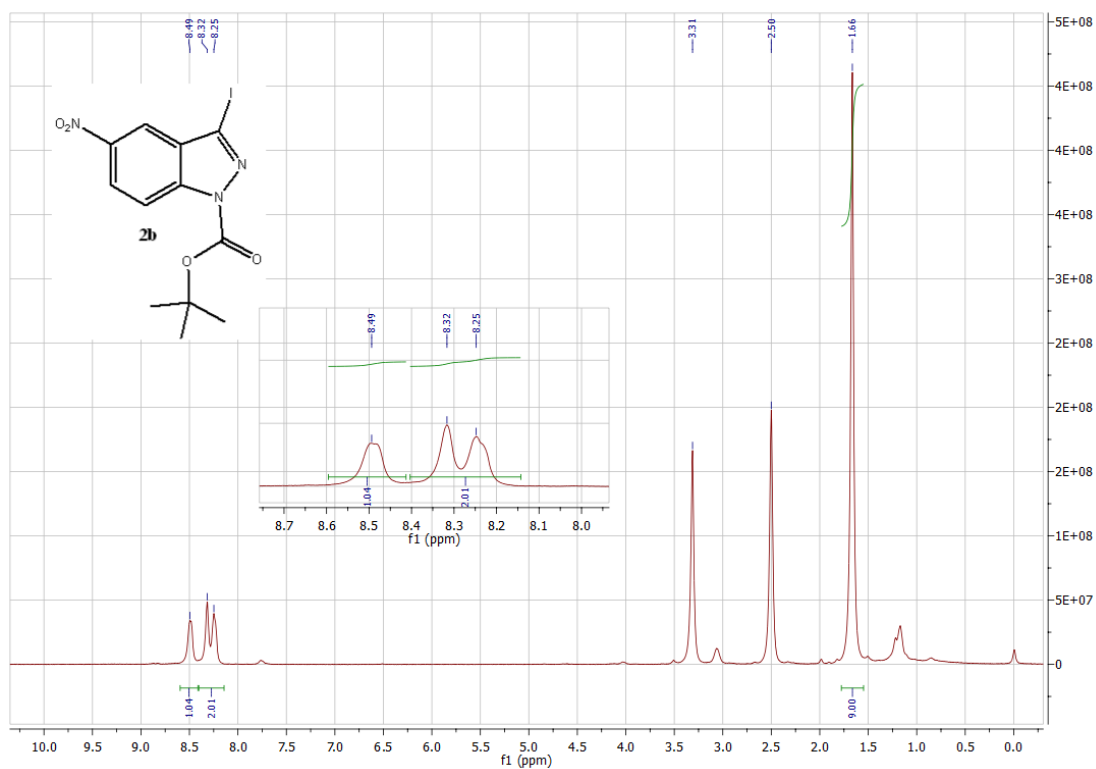

Figure S23. <sup>1</sup>H-NMR spectrum of **2b**

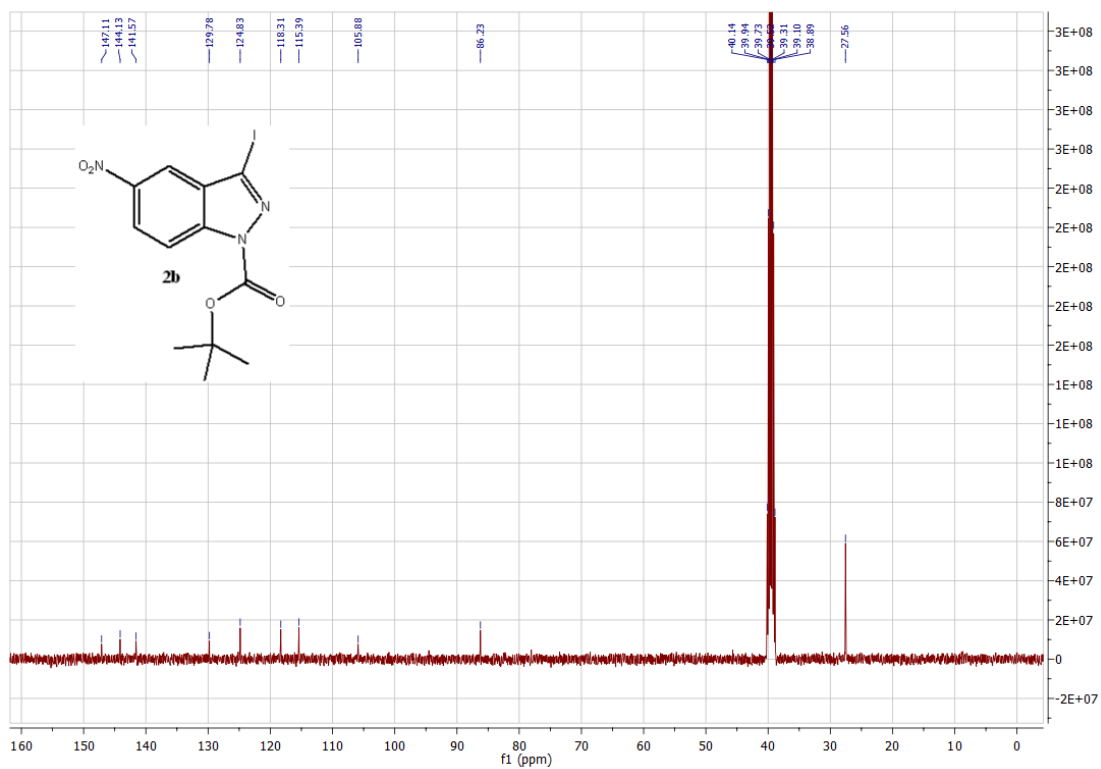

Figure S24. <sup>13</sup>C-NMR spectrum of **2b**

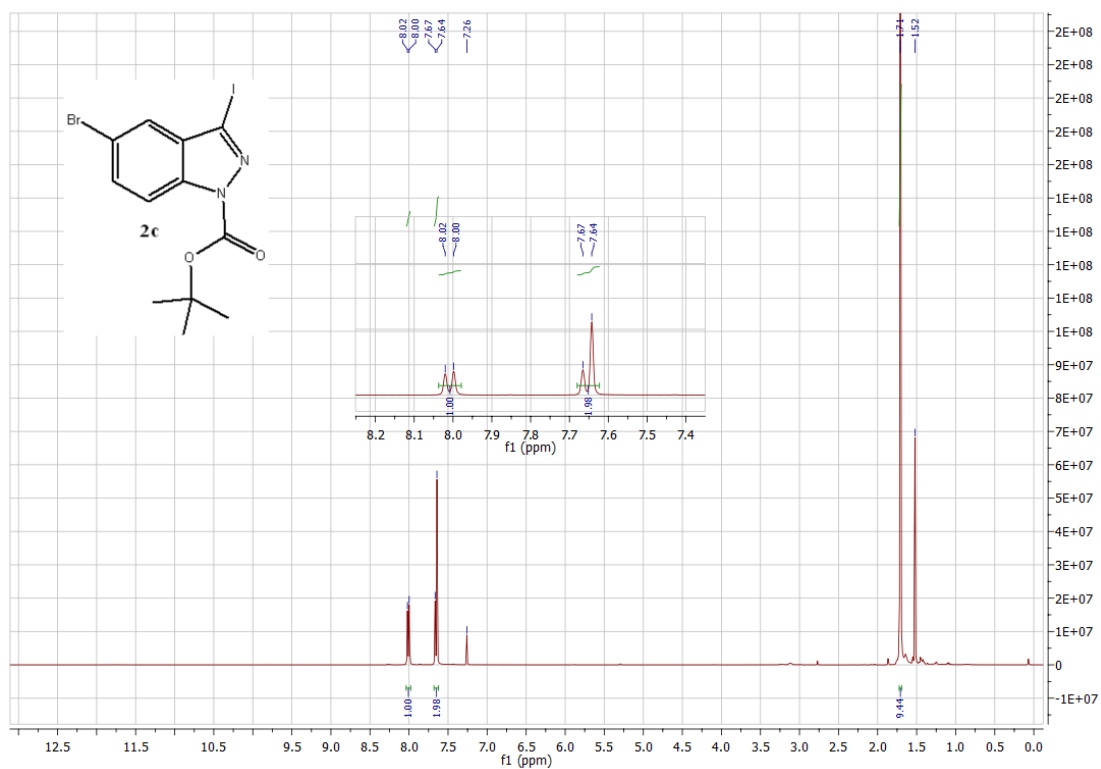

**Figure S25.  $^1\text{H-NMR}$  spectrum of **2c****

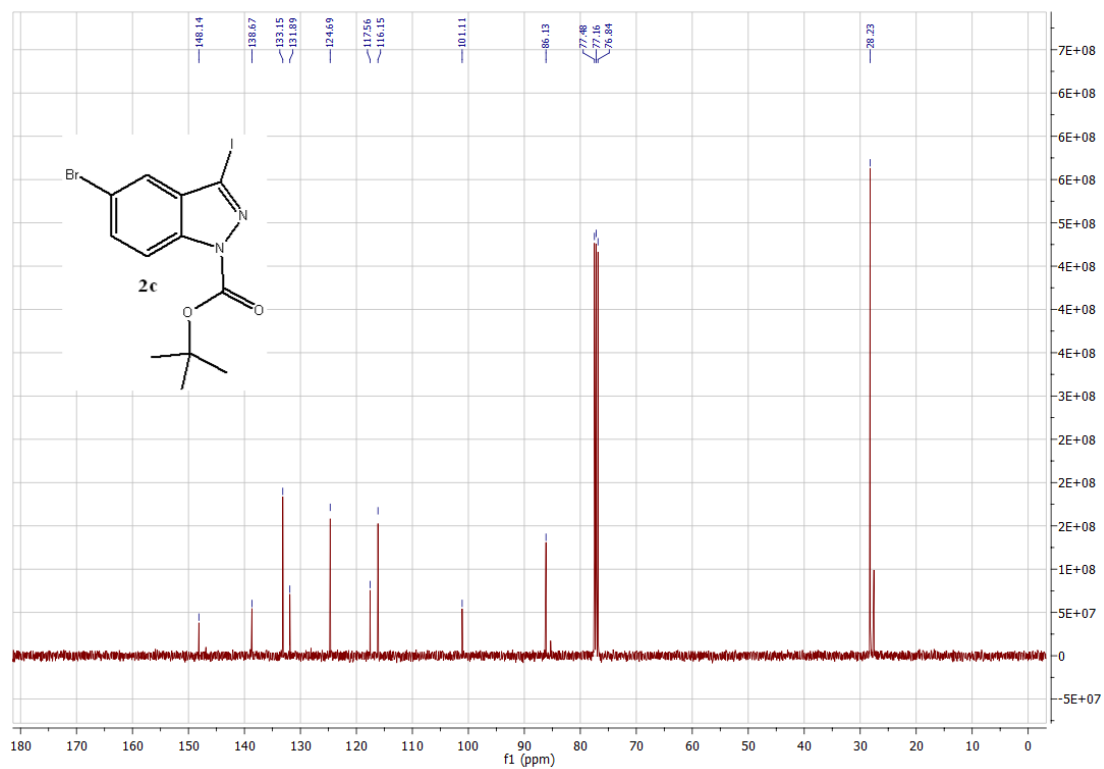

**Figure S26.  $^{13}\text{C-NMR}$  spectrum of **2c****

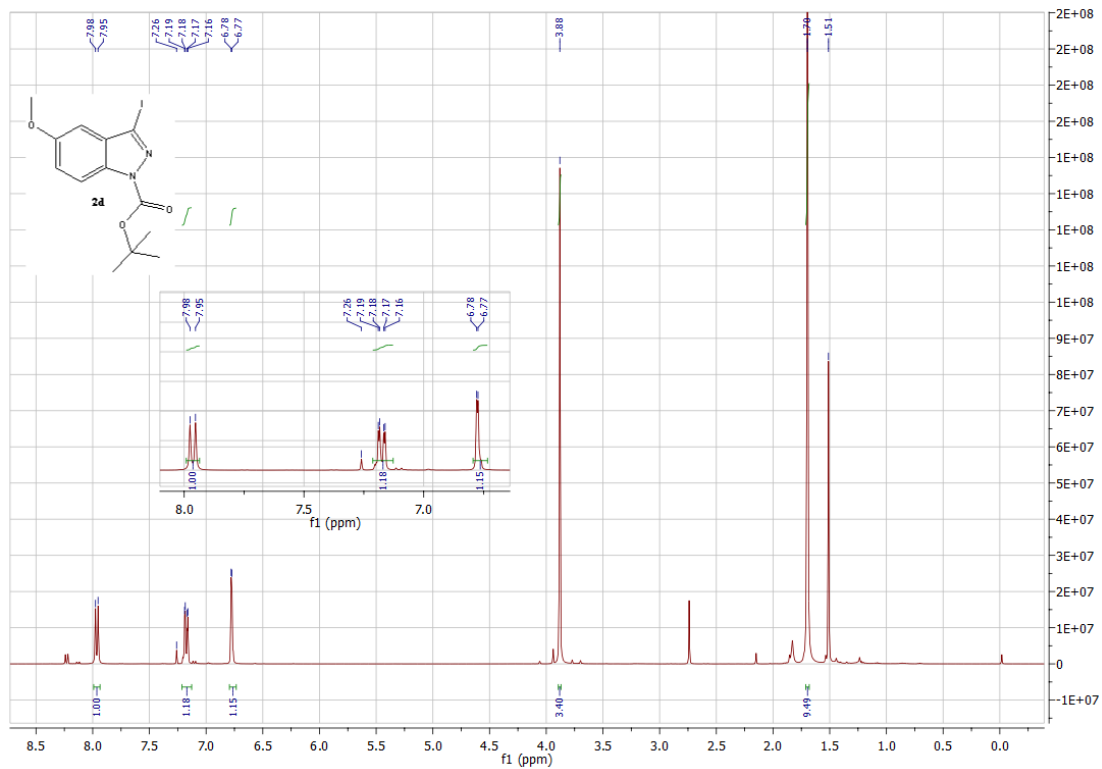

Figure S27. <sup>1</sup>H-NMR spectrum of **2d**

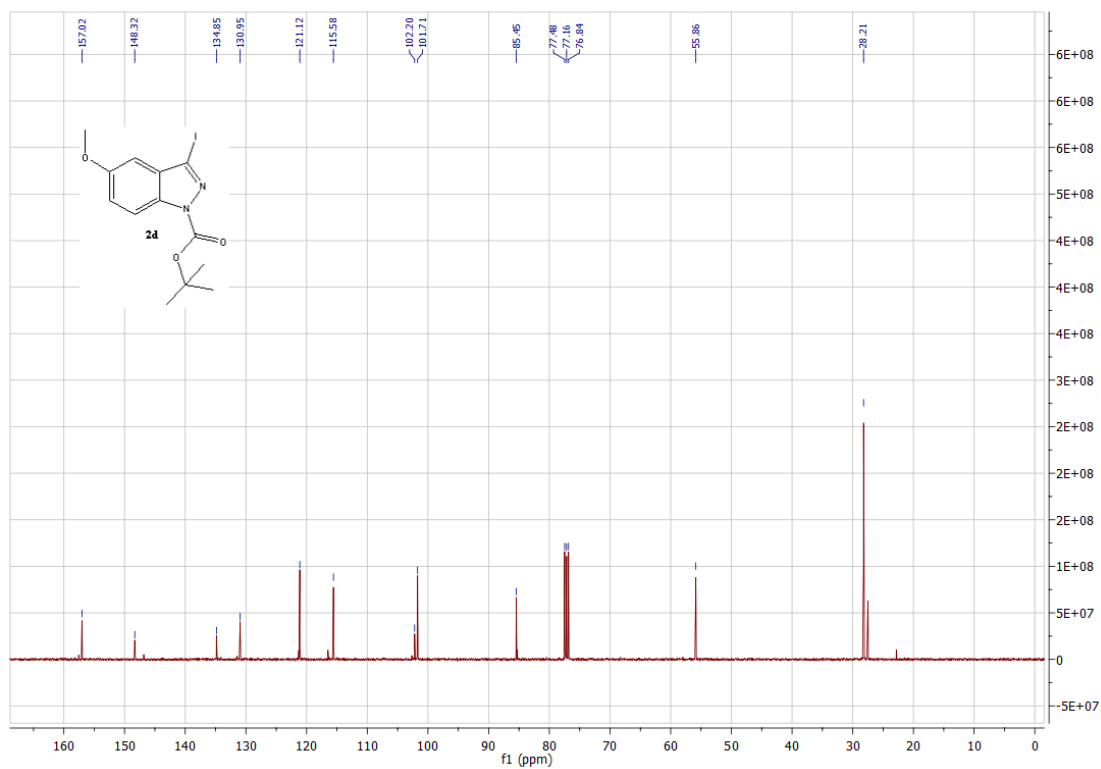

Figure S28. <sup>13</sup>C-NMR spectrum of **2d**

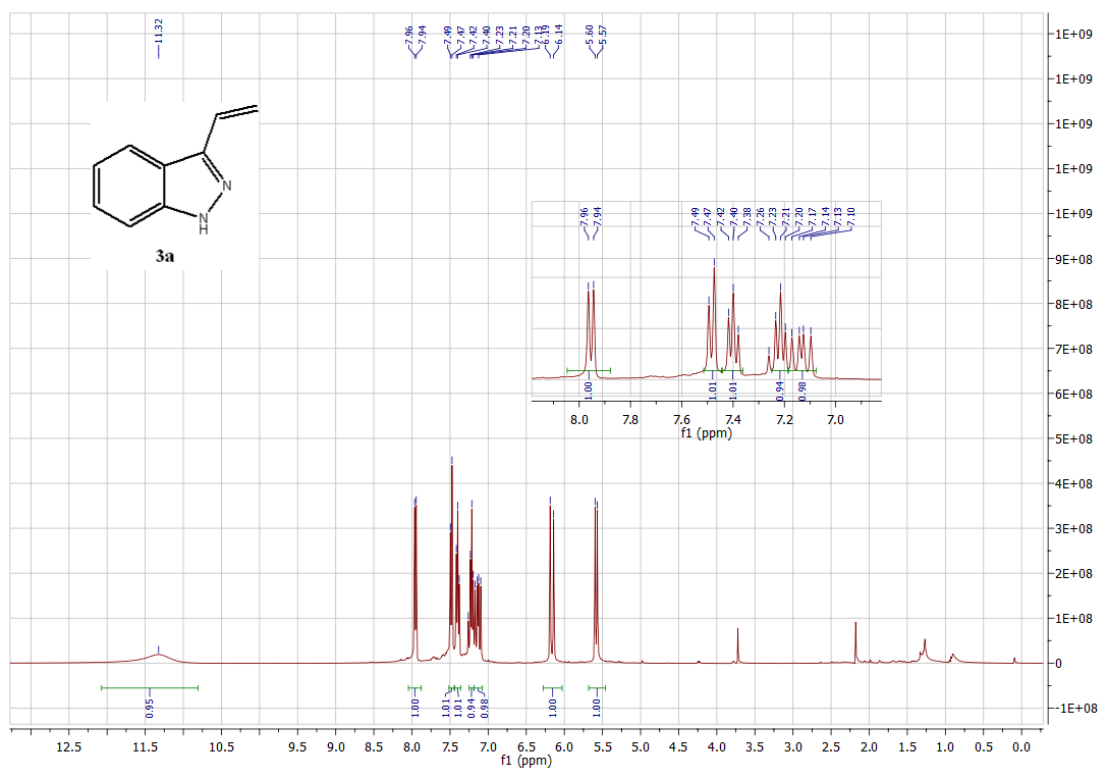

Figure S29. <sup>1</sup>H-NMR spectrum of 3a

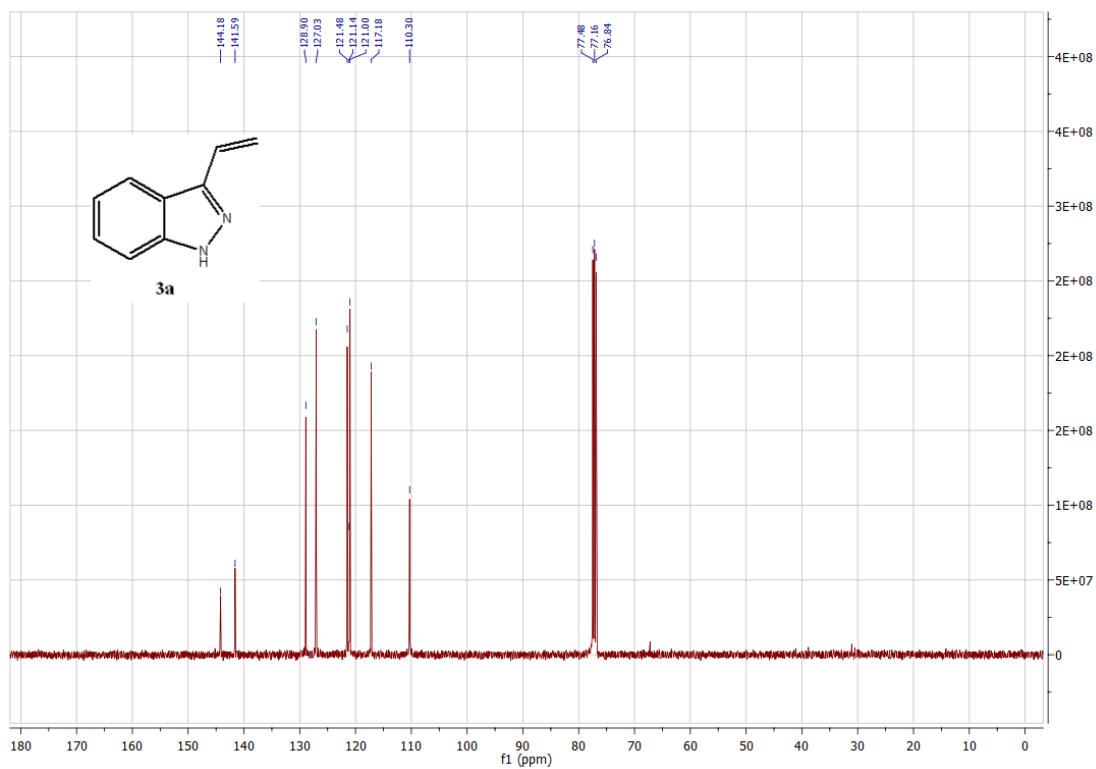

Figure S30. <sup>13</sup>C-NMR spectrum of 3a



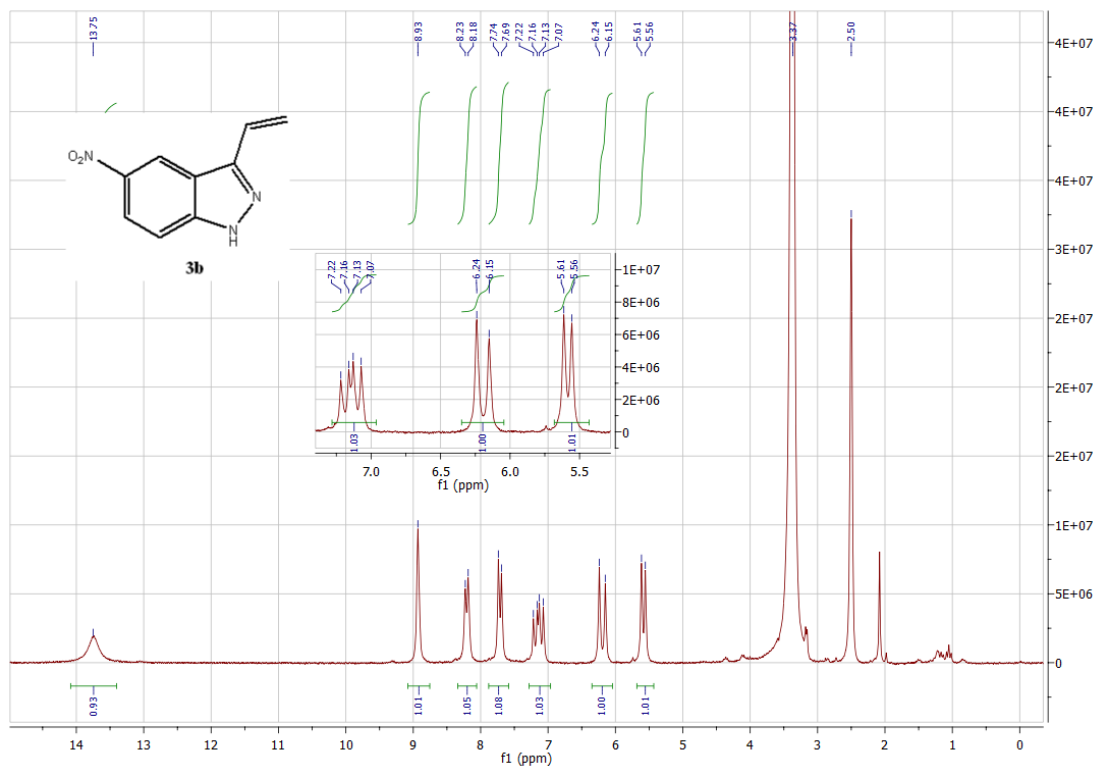

Figure S31. <sup>1</sup>H-NMR spectrum of **3b**

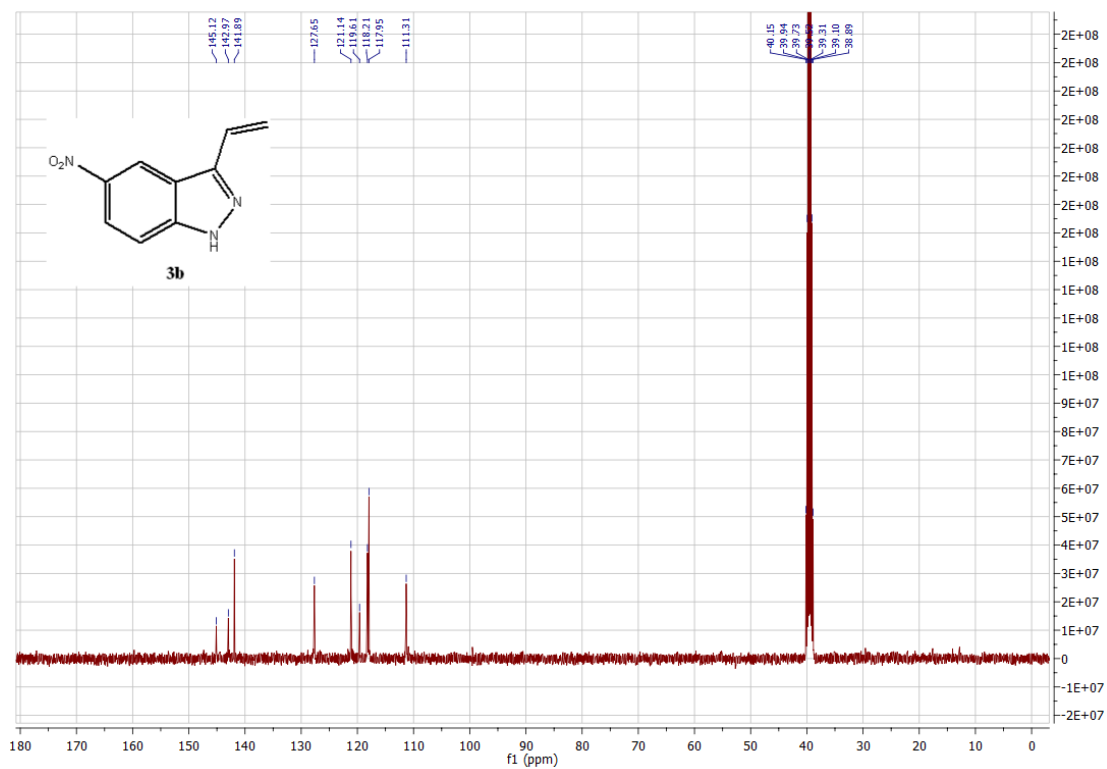

Figure S32. <sup>13</sup>C-NMR spectrum of **3b**

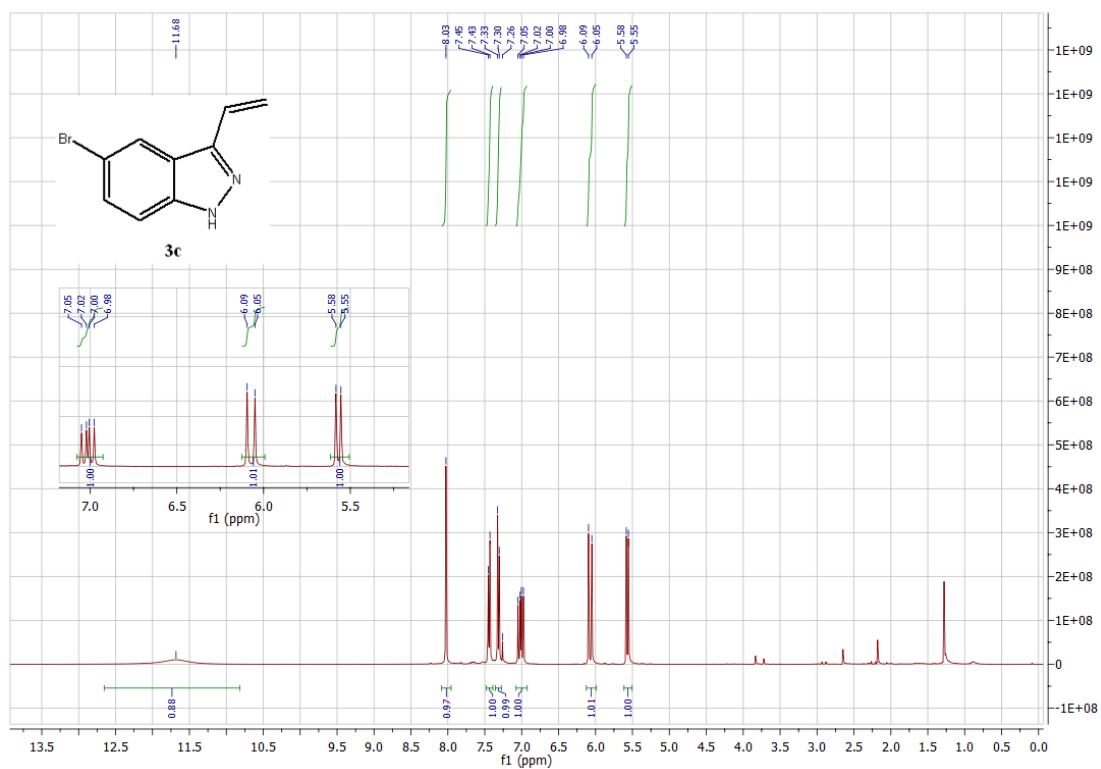

Figure S33. <sup>1</sup>H-NMR spectrum of **3c**

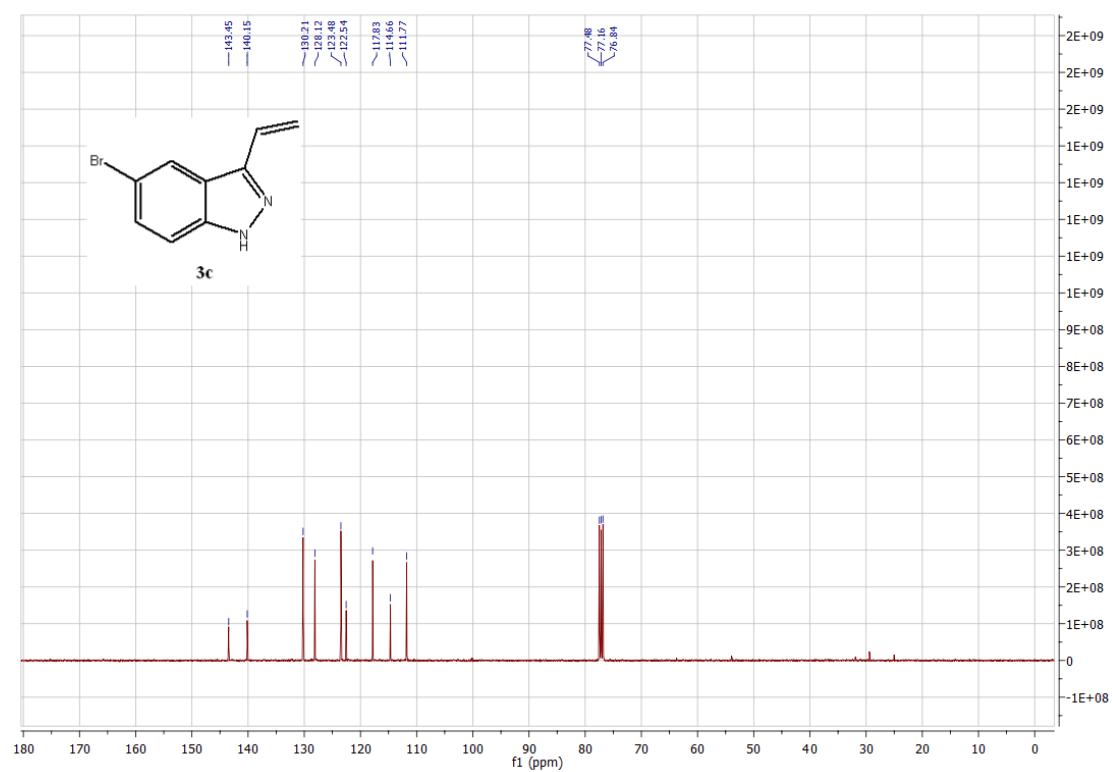

Figure S34. <sup>13</sup>C-NMR spectrum of **3c**

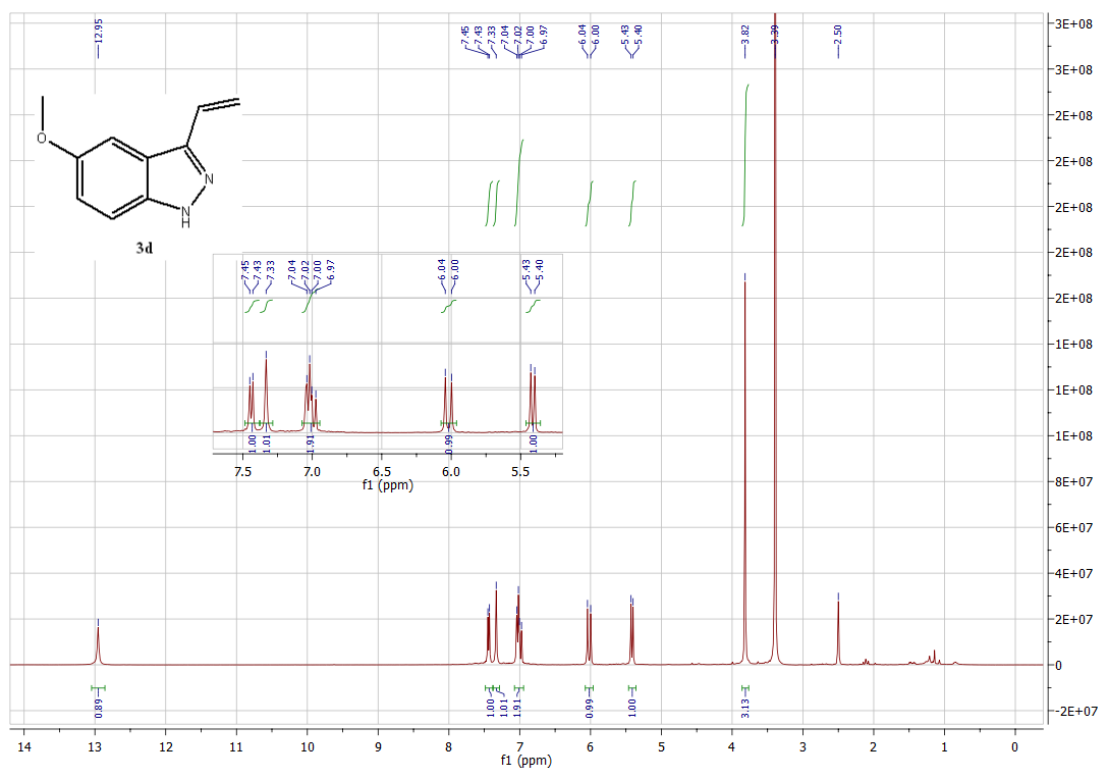

Figure S35. <sup>1</sup>H-NMR spectrum of 3d

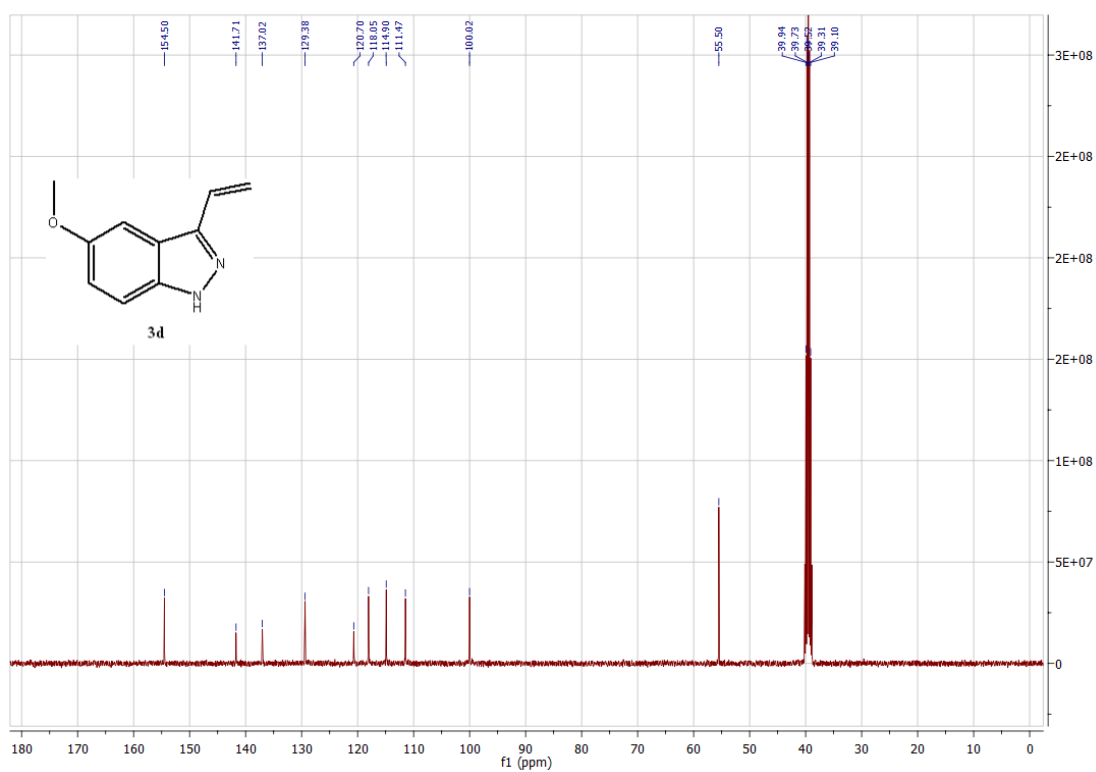

Figure S36. <sup>13</sup>C-NMR spectrum of 3d

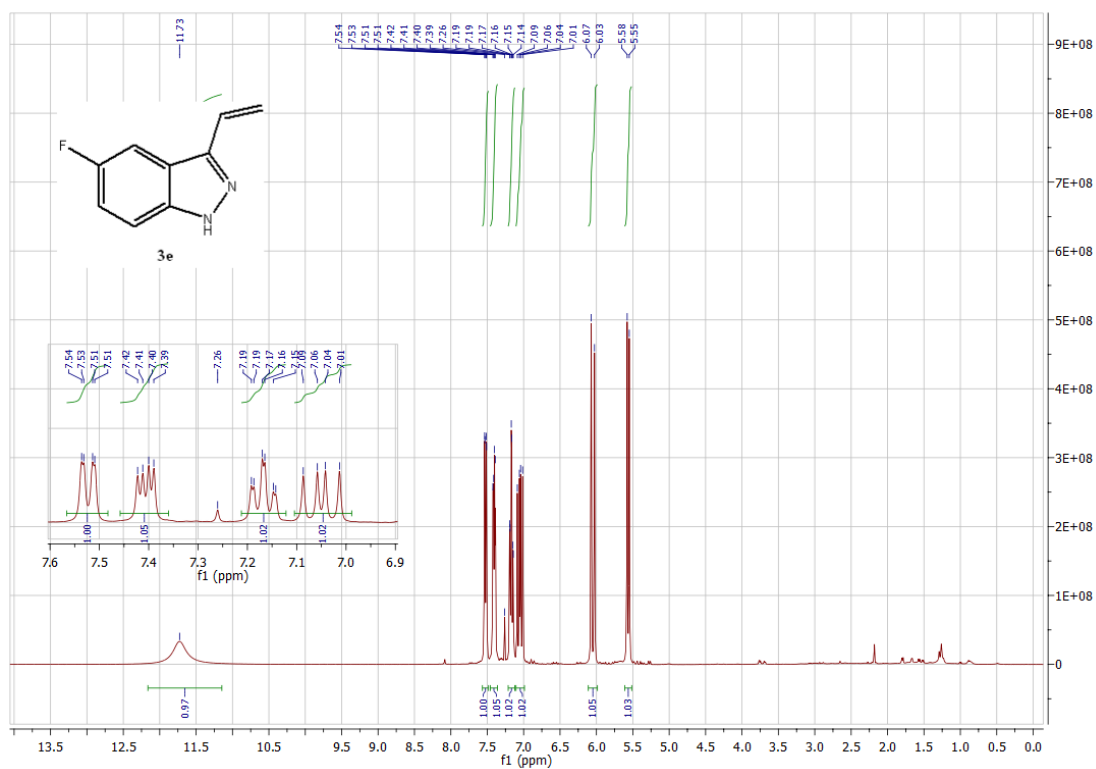

Figure S37. <sup>1</sup>H-NMR spectrum of 3e

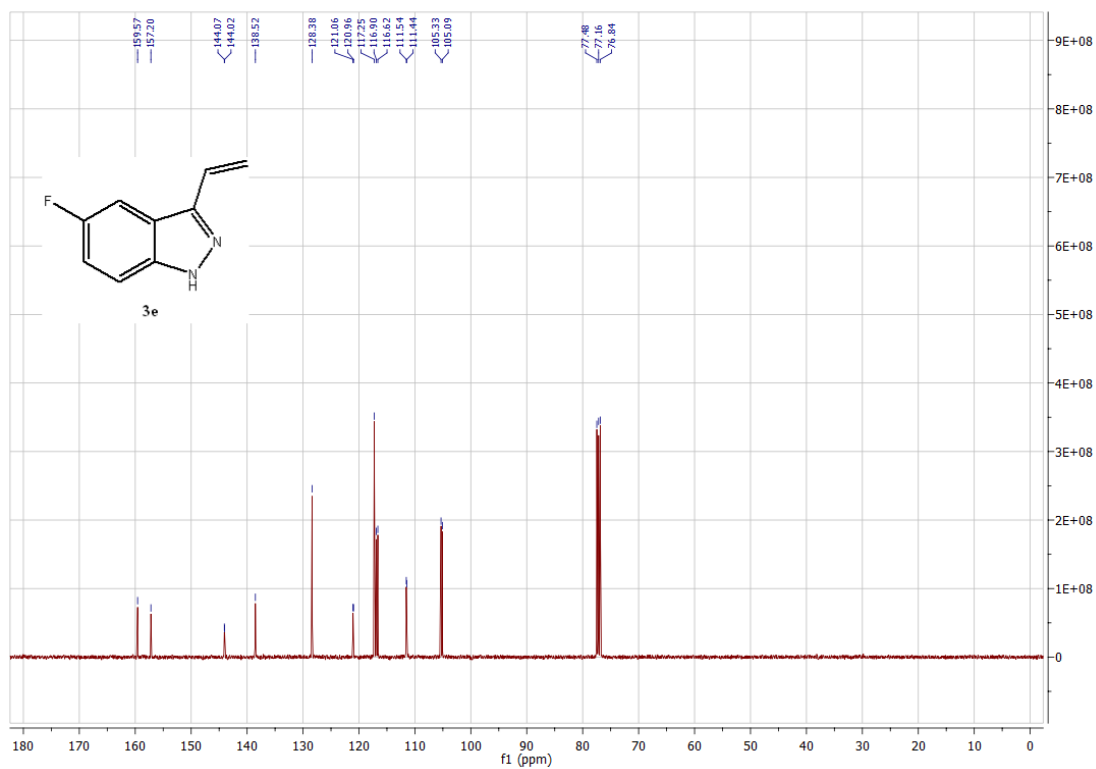

Figure S38. <sup>13</sup>C-NMR spectrum of 3e

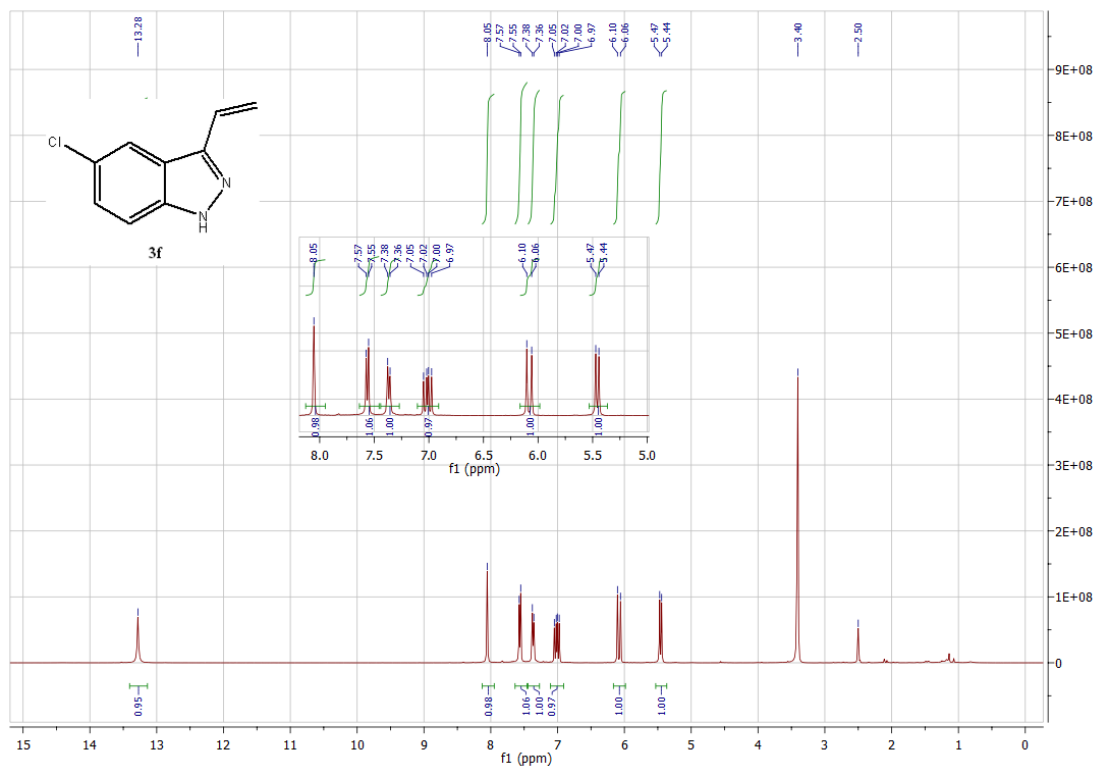

Figure S39. <sup>1</sup>H-NMR spectrum of 3f

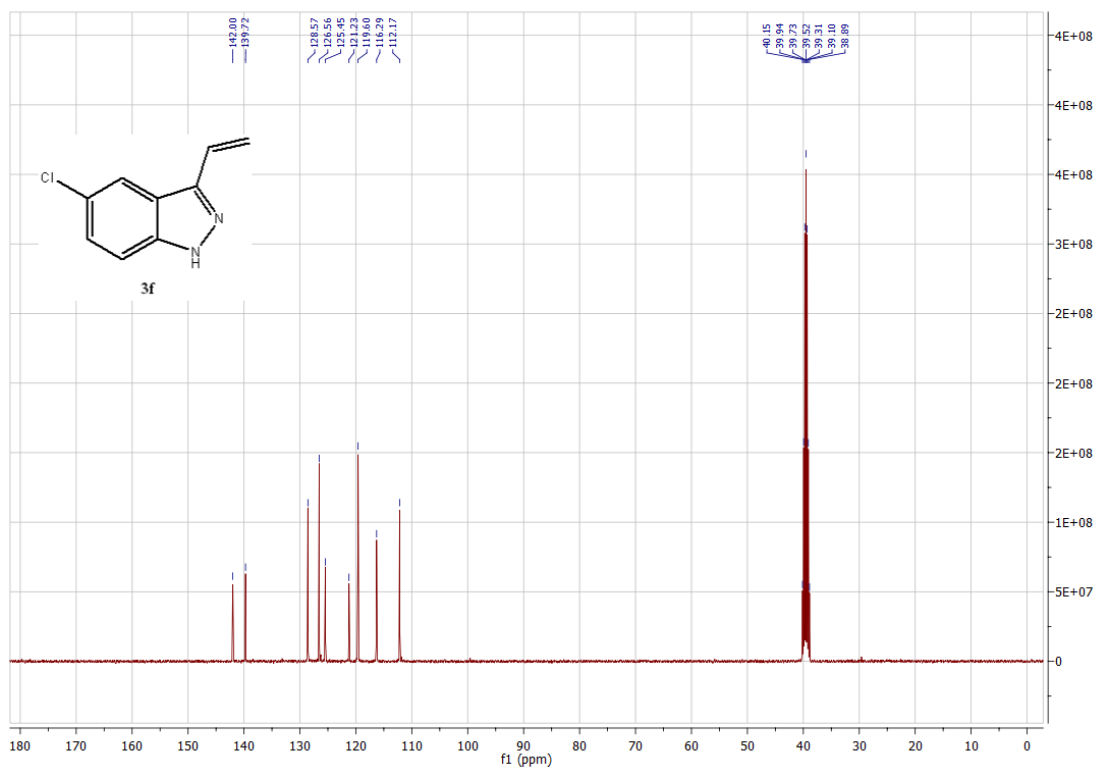

Figure S40. <sup>13</sup>C-NMR spectrum of 3f

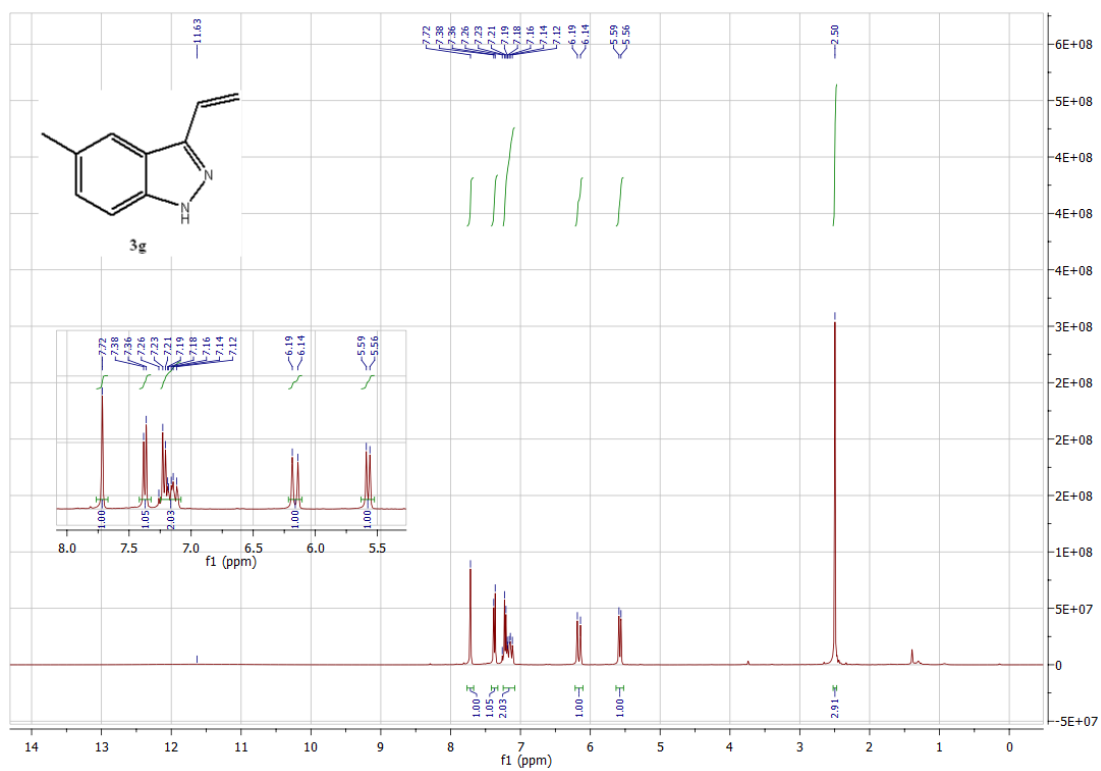

Figure S41. <sup>1</sup>H-NMR spectrum of 3g

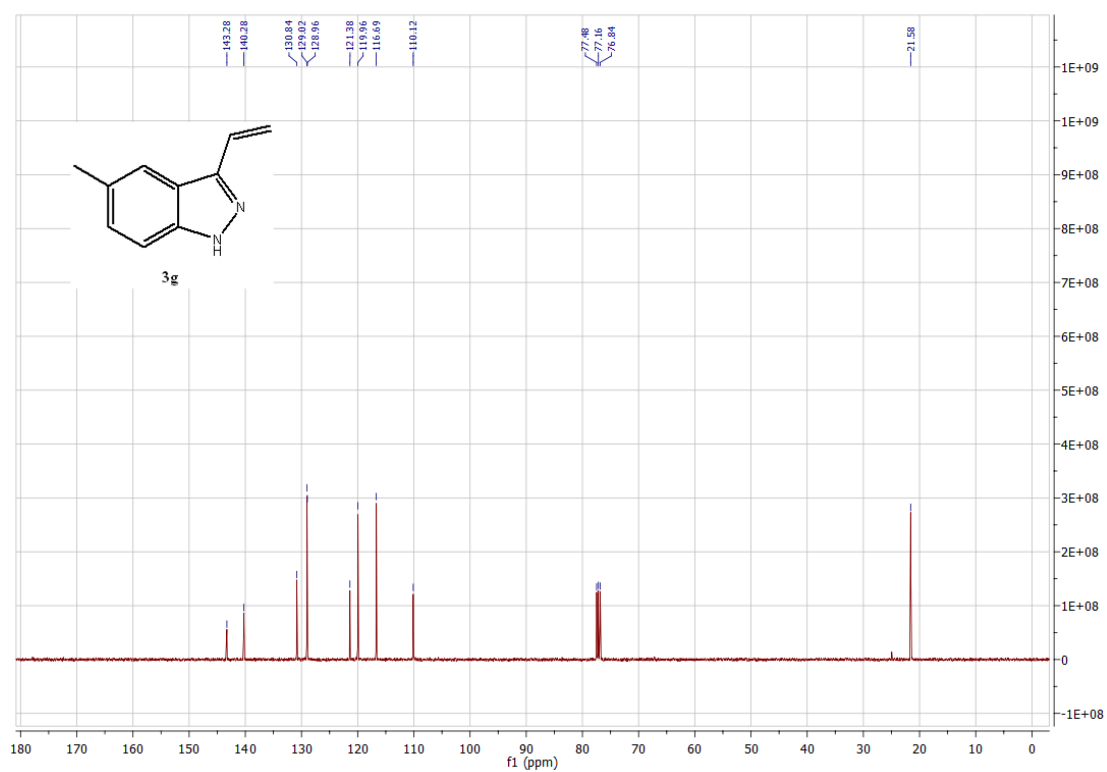

Figure S42. <sup>13</sup>C-NMR spectrum of 3g

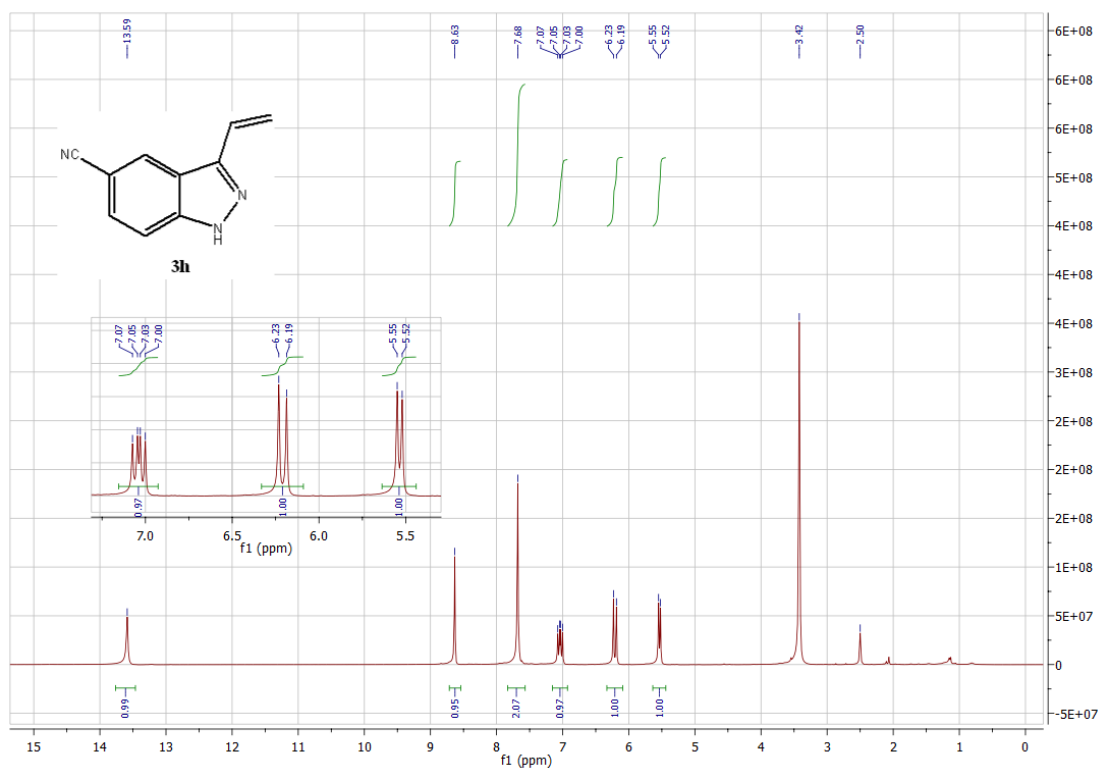

Figure S43. <sup>1</sup>H-NMR spectrum of 3h

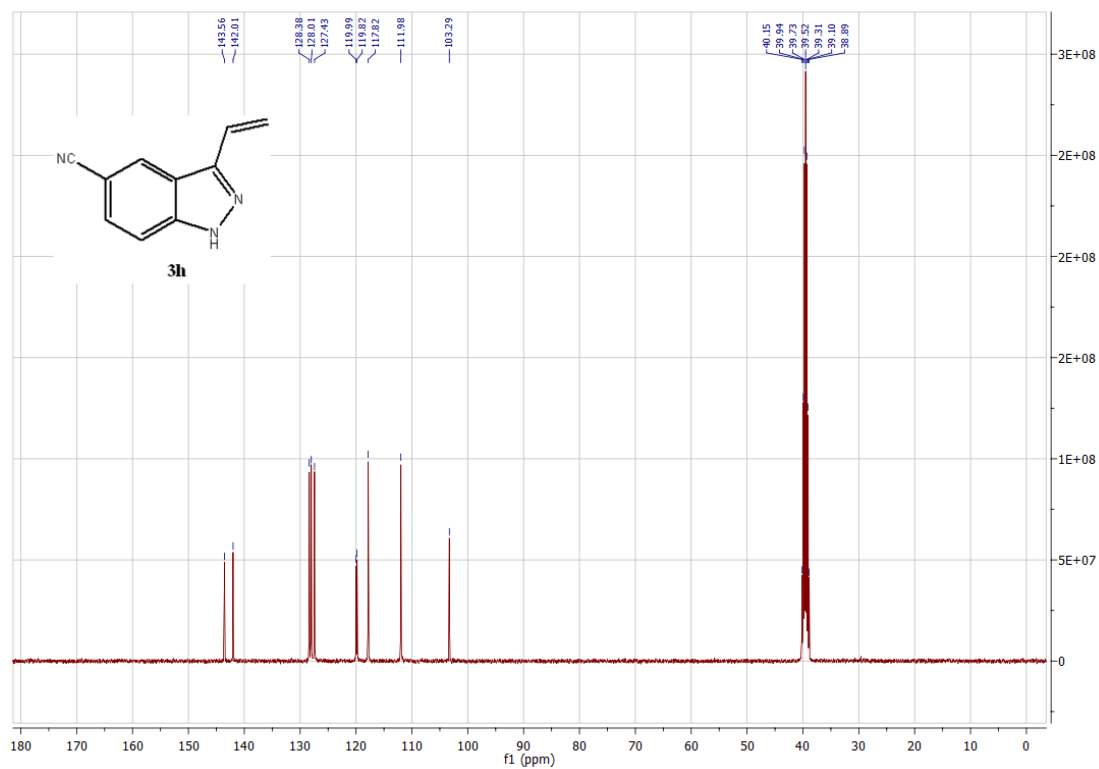

Figure S44. <sup>13</sup>C-NMR spectrum of 3h





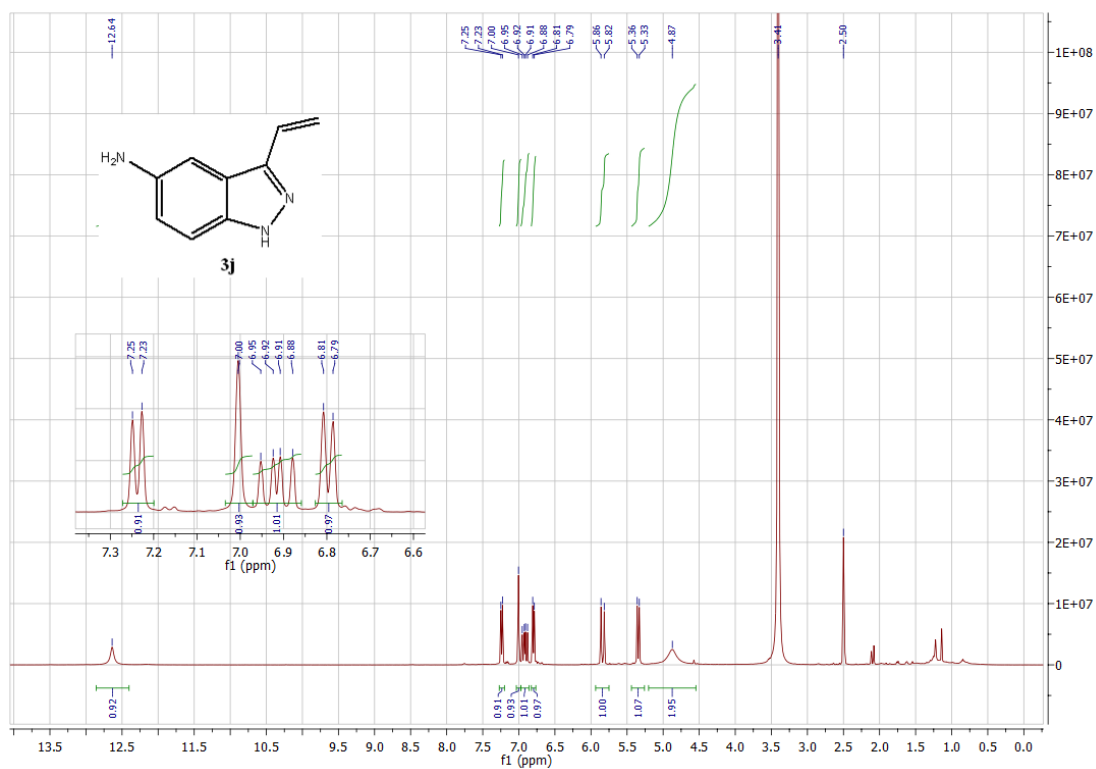

Figure S47. <sup>1</sup>H-NMR spectrum of 3j

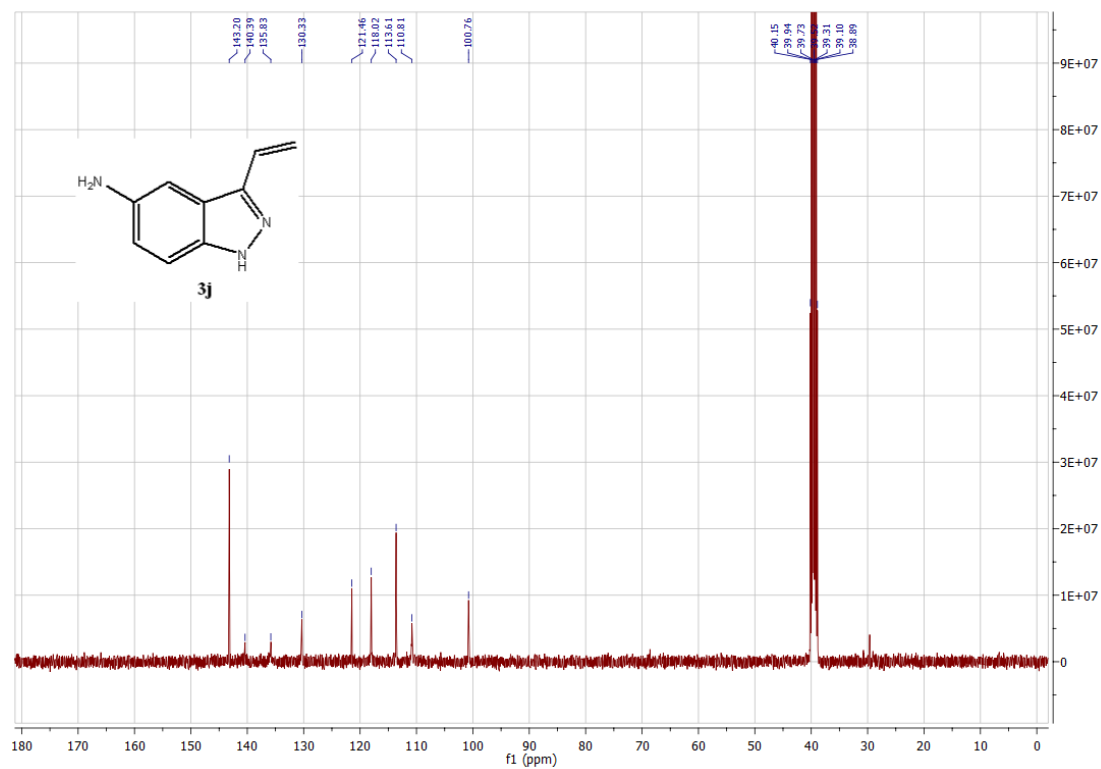

Figure S48. <sup>13</sup>C-NMR spectrum of 3j
